# Supplementary material for: Effectiveness of traditional lectures and case methods in Swedish general practitioners’ continuing medical education about COPD: a cluster randomised controlled trial
Source: PubMed Central journal article supplement — BMJ Open. 2018 Aug 10;8(8):e021982. doi: 10.1136/bmjopen-2018-021982 (PMC6089265; doi:10.1136/bmjopen-2018-021982), 2018-08-10
Supplement: bmjopen-2018-021982.draft_revisions.pdf [file bmjopen-2018-021982.draft_revisions.pdf]

# BMJ Open

BMJ Open is committed to open peer review. As part of this commitment we make the peer review history of every article we publish publicly available.

When an article is published we post the peer reviewers' comments and the authors' responses online. We also post the versions of the paper that were used during peer review. These are the versions that the peer review comments apply to.

The versions of the paper that follow are the versions that were submitted during the peer review process. They are not the versions of record or the final published versions. They should not be cited or distributed as the published version of this manuscript.

BMJ Open is an open access journal and the full, final, typeset and author-corrected version of record of the manuscript is available on our site with no access controls, subscription charges or pay-per-view fees (<http://bmjopen.bmj.com>).

If you have any questions on BMJ Open's open peer review process please email [info.bmjopen@bmj.com](mailto:info.bmjopen@bmj.com)

# BMJ Open

## Effectiveness of 2x2-hour traditional lectures and case methods in Swedish general practitioners' continuing medical education about COPD: a cluster randomized controlled trial

|                               |                                                                                                                                                                                                                                                                                                                                                                                                                                                                                                                                                                                                                                                          |
|-------------------------------|----------------------------------------------------------------------------------------------------------------------------------------------------------------------------------------------------------------------------------------------------------------------------------------------------------------------------------------------------------------------------------------------------------------------------------------------------------------------------------------------------------------------------------------------------------------------------------------------------------------------------------------------------------|
| Journal:                      | <i>BMJ Open</i>                                                                                                                                                                                                                                                                                                                                                                                                                                                                                                                                                                                                                                          |
| Manuscript ID                 | bmjopen-2018-021982                                                                                                                                                                                                                                                                                                                                                                                                                                                                                                                                                                                                                                      |
| Article Type:                 | Research                                                                                                                                                                                                                                                                                                                                                                                                                                                                                                                                                                                                                                                 |
| Date Submitted by the Author: | 31-Jan-2018                                                                                                                                                                                                                                                                                                                                                                                                                                                                                                                                                                                                                                              |
| Complete List of Authors:     | Sandelowsky, Hanna; Karolinska Institute, NVS, Section for Family Medicine and Primary Care; Academic Primary Health Care Centre, Krakau, Ingvar ; Karolinska Institutet, Department of Medicine, Division of Clinical Epidemiology<br>Modin, Sonja; Karolinska Institutet, NVS, Section for Family Medicine and Primary Care<br>Ställberg, Björn; Uppsala University, Department of Public Health and Caring Sciences, Family Medicine and Preventive Medicine<br>Johansson, Sven-Erik; Karolinska Institute, NVS, Section for Family Medicine and Primary Care<br>Nager, Anna; Karolinska Institute, NVS, Section for Family Medicine and Primary Care |
| Keywords:                     | cluster randomized controlled trial, professional training, continuing medical education, case method learning, traditional lectures, general practitioner                                                                                                                                                                                                                                                                                                                                                                                                                                                                                               |
|                               |                                                                                                                                                                                                                                                                                                                                                                                                                                                                                                                                                                                                                                                          |

SCHOLARONE™  
Manuscripts

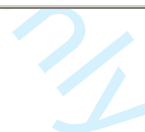

1  
2  
3 **Effectiveness of 2x2-hour traditional lectures and case methods in**  
4  
5 **Swedish general practitioners' continuing medical education about**  
6  
7 **COPD: a cluster randomized controlled trial**  
8  
9

10  
11 Hanna Sandelowsky<sup>1,2</sup>, MD, PhD student, [hanna.sandelowsky@ki.se](mailto:hanna.sandelowsky@ki.se), +46738902565  
12

13  
14 Ingvar Krakau<sup>1,3</sup>, MD, associate professor, [ingvar.krakau@ki.se](mailto:ingvar.krakau@ki.se), +46707774332  
15

16  
17 Sonja Modin<sup>1</sup>, MD, PhD, [sonja.modin@gmail.com](mailto:sonja.modin@gmail.com), +46706534806  
18

19  
20 Björn Stållberg<sup>4</sup>, MD, associate professor, [b.stallberg@telia.com](mailto:b.stallberg@telia.com), +46703149944  
21

22  
23 Sven-Erik Johansson<sup>1,2</sup>, professor, [sven-erik.johansson@ki.se](mailto:sven-erik.johansson@ki.se), +46708583505  
24

25  
26 Anna Nager<sup>1</sup>, MD, PhD, [anna@nager.se](mailto:anna@nager.se), +46707422317  
27  
28  
29

- 30  
31 1. Karolinska Institutet, NVS, Section for Family Medicine and Primary Care,  
32 Alfred Nobels Allé 23, SE-14183 Huddinge, Stockholm, Sweden  
33  
34 2. Academic Primary Health Care Centre, Stockholm County Council,  
35 Solnavägen 1 E, Box 45436, SE-104 31 Stockholm, Sweden  
36  
37 3. Karolinska Institutet, Department of Medicine, Division of Clinical  
38 Epidemiology, SE-171 76 Stockholm, Sweden  
39  
40 4. Uppsala University, Department of Public Health and Caring Sciences, Family  
41 Medicine and Preventive Medicine, Box 564, SE-751 22 Uppsala, Sweden  
42  
43  
44  
45  
46  
47

48 **Correspondence to:** [hanna.sandelowsky@ki.se](mailto:hanna.sandelowsky@ki.se)  
49

50 **Word count:** 4246  
51  
52  
53  
54  
55  
56  
57  
58  
59  
60

## ABSTRACT

**Objectives:** To study the effects of CME about COPD for GPs by comparing two commonly used CME methods with each other and no CME (reference group).

**Design:** A pragmatic cluster randomized controlled trial with primary health care centers (PHCCs) as units of randomization.

**Setting, participants and interventions:** 24 PHCCs in Stockholm County, Sweden, were randomized into two CME intervention arms: case method learning (CM) (n=12) and traditional lectures (TL) (n=12). A reference group without CME (n=11) was recruited separately. GPs (n=255) participated in the study arm to which their PHCC was allocated: CM, n=87; TL, n=93; and reference, n=75. Two 2-hour CME seminars were given in a period of 3 months.

**Primary outcome measures:** Changes in scores between baseline and 12 months on a 13-item questionnaire about evidence-based COPD management (0-2 points/question, maximum total score 26 points).

**Results:** 133 (52%) GPs completed the questionnaire both at baseline and 12 months. Both CM and TL resulted in small yet significantly higher total scores at 12 months than at baseline (CM, 10.34 vs 11.44; TL, 10.21 vs 10.91;  $p<0.05$ ); there were few significant differences between these CME methods. At both baseline and 12 months, all three groups' scores were generally high on questions about smoking cessation support and low on those that measured spirometry interpretation skills, interprofessional care, and management of multimorbidity.

**Conclusions:** Neither short CM nor short TL CME sessions substantially improve GPs' skills in managing COPD. It is justified to challenge the use of these common CME methods as a strategy for improving GPs' level of knowledge about

1  
2  
3 management of COPD and other complex chronic diseases characterized by  
4  
5 multimorbidity.  
6

7 **Trial registration:** ClinicalTrials.com, Protocol Record 2013/232-31/5.  
8

9  
10 **Funding:** Stockholm and Dalarna County Councils.  
11

12  
13  
14 **Keywords:** continuing medical education, professional training, case method  
15  
16 learning, traditional lectures, primary care physicians, COPD, chronic diseases,  
17  
18 primary care, cluster randomized controlled trial.  
19  
20  
21  
22  
23  
24  
25  
26  
27  
28  
29  
30  
31  
32  
33  
34  
35  
36  
37  
38  
39  
40  
41  
42  
43  
44  
45  
46  
47  
48  
49  
50  
51  
52  
53  
54  
55  
56  
57  
58  
59  
60

## STRENGTHS AND LIMITATIONS OF THIS STUDY

- The educational interventions (2x2-hour traditional lectures and case-based seminars) studied in this cluster randomized controlled trial are frequently used in real-life Swedish primary care, which strengthens the relevance of this study.
- The cluster design of study was a strength, since it decreased potential bias from contamination across individuals at each primary health care center.
- The follow-up investigation 12 months after the intervention was a strength, as it permitted us to observe the effects of the educational interventions beyond the immediate post-study period.
- The main limitation of the study was the large percentage of non-responders at the end, which significantly impaired the ability to draw conclusions.
- Using a written test of knowledge (the GP questionnaire) to assess the effects of the educational interventions was not optimal because it did not assess change in GPs' behaviors and because the scaling was narrow, decreasing the chances of clear distribution of the scores, which in turn led to few statistically significant changes in the scores.

## INTRODUCTION

Chronic obstructive pulmonary disease (COPD) is often comorbid with other conditions and is generally underdiagnosed and insufficiently managed in primary care (1). Despite improvements in recent years, primary care personnel can still contribute to delays in COPD diagnosis and care through insufficient actions to prevent, detect, and manage the disease (1-4).

In Sweden, the majority of patients with COPD are managed in primary care by general practitioners (GPs), who typically work together with other GPs in group practices and often in co-operation with specialized asthma/COPD nurses and pulmonary rehabilitation personnel (4, 5). As GPs are usually the patient's first professional health care contact, their knowledge about and skills in COPD management need to be up-to-date (6). However, there is a considerable gap between current COPD guidelines and what is actually done at GPs' practices. To help transfer theory into practice, more studies on the implementation of COPD guidelines are needed (7).

Continuing medical education (CME) is a necessary step in implementing optimal care. Although modern research stresses the effectiveness of multiple educational methods in CME (8-10), Swedish GPs still often sign up for 1-2 hour lectures, possibly because of their busy schedules. Traditional lectures (TL) are carried out mainly in didactic style with a CME leader as an academic expert. CME that uses case method learning (CM) can be carried out in similar settings and in a similar amounts of time as TL, but the CME leader uses an interactive teaching approach. The professional's perspective on the case described is a central feature in the discussions (11). When used in CME in primary care settings, CM has a positive

1  
2  
3 impact on learning (12, 13). In a typical CM seminar, a CME leader facilitates the  
4  
5 discussion of one to two patient cases. CM stimulates creative thinking,  
6  
7 communication, tolerance for different views, the ability to defend one's own point of  
8  
9 view with logic, analysis, and decision making (14). It is a learning method that  
10  
11 requires previous knowledge and clinical experience in the subject and maturity in the  
12  
13 participants.  
14  
15

16  
17 The current study is part of the PRIMAIR study, a cluster-randomized controlled trial  
18  
19 (CRCT) at primary health care centers (PHCC) in Stockholm County in 2014-2017.  
20  
21 PRIMAIR aimed to assess the effects of CME on professional COPD practice (GP-  
22  
23 related outcomes) and healthcare outcomes (patient-related outcomes). This paper  
24  
25 presents the GP-related outcomes.  
26  
27

28  
29 The aim of the current study was to compare the effects of CME on the topic of  
30  
31 COPD, delivered in the form of praxis-typical, short (1-2 hour) sessions of either CM  
32  
33 or TL, tailored for and targeted to GPs. The hypothesis was that CME based on CM  
34  
35 leads to greater improvements in GPs' level of knowledge about and skills in COPD  
36  
37 management than TL or no CME.  
38  
39  
40  
41  
42

## 43 **METHODS**

44  
45 This paper was written in line with the 2010 Consolidated Standards of Reporting  
46  
47 Trials (CONSORT) statement: extension to cluster randomized trials (15). The  
48  
49 CONSORT checklist and flow chart (Figure 1) were used.  
50  
51

52  
53 Using a computer randomization program, the authors randomized 24 PHCCs in  
54  
55 Stockholm, Sweden, into two intervention arms: a CM arm and a TL arm. A reference  
56  
57 group of 11 PHCCs (no CME) was recruited separately and was not randomized, as  
58  
59



1  
2  
3 the PHCCs in this group would not receive CME. The GPs participated in the study  
4  
5 arm to which their PHCC was allocated.  
6

7  
8 The pharmaceutical industry did not participate in any part of the study, and we did  
9  
10 not offer financial incentives to the participants. As there are no formal requirements  
11  
12 for CME for GPs in Sweden, educational credits were not offered.  
13

14  
15 The CME sessions took place at the PHCCs. Five CME leaders, all GPs competent  
16  
17 and experienced in COPD management, ran two 2-hour sessions at each PHCC.  
18

19 The two sessions took place a maximum of 3 months apart. Each PHCC was  
20  
21 assigned the same CME leader and CME method (either CM or TL). Thus, four TL  
22  
23 leaders taught at two to four PHCCs each, and one CM leader taught at all 12  
24

25 PHCCs that received CM. John Biggs' educational theory of constructive alignment  
26  
27 (16) was used to align the intended learning outcomes, learning activities, and  
28  
29 assessments. The intended learning outcomes of the CME were derived from the  
30

31 pre-2015 COPD guidelines (2, 17, 18) and from a 2013 qualitative study of GPs in  
32  
33 Stockholm that described barriers to and facilitators of the COPD guideline  
34  
35 implementation process (19). Each leader adhered to the intended learning  
36  
37 outcomes, but the learning activities differed in the CM and LT intervention groups.  
38

39 The leaders were also allowed to use their own presentation materials, such as slide  
40  
41 shows and handouts. Apart from a short didactic introduction, participant activating  
42  
43 methods (discussions) were the main method of used in the CM sessions, whereas  
44  
45 the TL sessions followed a traditional didactic style.  
46  
47  
48

49  
50 A GP questionnaire, constructed by the authors and improved after a "think-aloud"  
51  
52 discussion with a group of non-participating GPs, was used to assess GPs' level of  
53  
54 knowledge. The paper format questionnaire consisted of five short patient case  
55  
56 vignettes and two to three questions per vignette (13 in total). The questions were  
57  
58  
59  
60

1  
2  
3 about “knowledge/skills” and “practical management” and consisted of a mixture of  
4 multiple choice and open questions. The participants could score 0, 1, or 2 points per  
5 question. Responses were scored with a premade scoring template. GPs completed  
6 the questionnaires immediately prior to and 12 months after the CME sessions,  
7 taking 20 to 30 minutes each time. At baseline, the GPs replied to the questionnaire  
8 on their own without consulting each other. The GPs in the intervention arms did so  
9 at the first CME session, and the GPs in the reference group did so at a staff  
10 meeting. At 12 months, most GPs, regardless of study arm, filled in the questionnaire  
11 at an ordinary staff meeting. All did so individually. The few GPs who were not  
12 present at the staff meeting were contacted by telephone or email and reminded  
13 twice. They were allowed to complete the questionnaire on their own.  
14  
15  
16  
17  
18  
19  
20  
21  
22  
23  
24  
25  
26

27 The GP questionnaire with a summary of the intended learning outcomes and the  
28 scoring template is found in Supplementary data file 1.  
29  
30  
31

32 Information about GPs’ gender, age, years in the profession, and degree (specialist  
33 in family medicine or in training to become one) was gathered at baseline. Other  
34 information gathered at baseline included data on the PHCC where they worked,  
35 such as ownership (county council or private), whether there was a nurse-led  
36 asthma/COPD clinic at the PHCC, and sociodemographic characteristics of the  
37 PHCC’s catchment area (Care Need Index [CNI]) (20). The CNI is a deprivation index  
38 based on sociodemographic factors, including percentage of older adults living alone,  
39 children under age 5, unemployed people, people with low educational status, single  
40 parents, high mobility, and foreign-born people. A high CNI score indicates high  
41 sociodemographic burden. The mean CNI score PHCC catchment areas in  
42 Stockholm County is 2.49.  
43  
44  
45  
46  
47  
48  
49  
50  
51  
52  
53  
54  
55  
56  
57  
58  
59  
60

1  
2  
3 GP sample size was determined by the power calculation of the patient sample size  
4  
5 in the PRIMAIR Study, which was determined to be 230 patients with COPD in GOLD  
6  
7 stages 2 to 3 (2) in each arm. To keep the number of clusters reasonable, we chose  
8  
9 to invite only PHCCs with more than 10,000 registered patients (n=80). We estimated  
10  
11 that 10 to 12 PHCCs were needed per arm to achieve sufficient statistical power for  
12  
13 the patient sample. Accordingly, the number of GPs was determined by the number  
14  
15 of PHCCs we included. Unequal cluster sizes (5 to 10 GPs) were expected because  
16  
17 of variations in staff numbers at baseline and dropouts at 12 months. The intraclass  
18  
19 correlation coefficient (ICC) was set at 0.01 based on earlier studies on cluster  
20  
21 randomizations in primary care (21-23).  
22  
23  
24

## 25 **Statistics**

26  
27 We performed the statistical analysis with STATA, version 14 (Stata Corp. 2015.  
28  
29 Stata Statistical Software: Release 14. College Station, TX: Stata Corp. LP) and  
30  
31 SPSS, version 23 (PSP (IBM Corp. Released 2013. IBM SPSS Statistics for  
32  
33 Windows, Version 23.0. Armonk, NY: IBM Corp.). We computed summary statistics  
34  
35 such as means, proportions, and measures with standard parametric methods. We  
36  
37 used a McNemar test to compare matched pairs of scores per question at baseline  
38  
39 and 12 months for proportions of GPs who scored “0 points” vs “1 or 2 points.” We  
40  
41 used `clttest` and `xtreg` (adjusting for cluster) to analyze differences in total scores  
42  
43 within the study arms and for adjusting for “total scores at baseline,” “CNI,” and  
44  
45 “years in profession.” A transition model, adjusted for clusters, was applied to analyze  
46  
47 associations between items (“0 points” or “1 or 2 points”) and study arms at baseline  
48  
49 and 12 months, which also provided odds ratios (ORs) and their 95% confidence  
50  
51 intervals (CIs). In a transition model the outcome variable at a previous time point is  
52  
53 included as a fixed effect covariate. We condition the response at time  $j$  on the  
54  
55  
56  
57  
58  
59  
60

1  
2  
3 response at time j-1. ICC was estimated by xtlogit. P-values <0.05 were considered  
4  
5 indicative of statistical significance.  
6  
7

8 A detailed description of the methodology and interventions is found in the study  
9  
10 protocol (24).  
11  
12  
13  
14  
15

## 16 **Ethics**

17  
18  
19 The present CRCT, including a model consent form and other related documentation  
20  
21 given to participants, was approved by the Regional Ethical Review Board of  
22  
23 Stockholm (ref 2013/232-31/5). Prior to enrollment, all PHCC managers and all  
24  
25 participants provided written informed consent to be involved in the study. The study  
26  
27 is registered at [www.clinicaltrials.com](http://www.clinicaltrials.com), Protocol Record NCT02213809, 10 August  
28  
29 2014.  
30  
31

## 32 **RESULTS**

### 33 **Description of the participants**

34  
35  
36 At baseline, 207 GPs attended the CME sessions. In the CM arm, 87 of 100 GPs  
37  
38 (87%), in the TL arm, 93 of 107 GPs (87%) agreed to participate in the study. The  
39  
40 reference group consisted of 75 GPs. The majority (90%) of the GPs who did not  
41  
42 agree to participate (n=27) worked at a PHCC without a nurse-led asthma/COPD  
43  
44 clinic (p<0.005). They did not differ from the participants regarding age, gender,  
45  
46 years in profession, educational degree, or PHCC's CNI scores or ownership form.  
47  
48  
49  
50  
51  
52 Of the 255 participants who responded to the questionnaire at baseline, 122 (48%)  
53  
54 did not respond again at 12 months ("non-responders"). The remaining 133 GPs  
55  
56 were the final participants ("responders"). There were no significant differences  
57  
58  
59  
60

1  
2  
3 between any of the groups studied (the two intervention arms and the reference  
4 group) in the proportions of responders and non-responders. A higher percentage of  
5 the non-responders than responders were employed at PHCCs in socially deprived  
6 areas of Stockholm ( $p < 0.05$ ). The characteristics of the responders and non-  
7 responders are seen in Table 1.  
8  
9  
10  
11  
12

13  
14 A higher percentage of GPs in the CM arm than the TL arm and the reference group  
15 worked at a PHCC with a nurse-led asthma/COPD clinic (64% vs 36%-38%,  
16  $p = 0.012$ ). A higher percentage of GPs in the reference group than the CM and TL  
17 arms worked at privately run PHCCs (72% vs 32%-42%,  $p = 0.001$ ). The means for  
18 gender, age, years in profession, and CNI scores did not differ significantly between  
19 the GPs in the groups studied (the two intervention arms and the reference group),  
20 and the participants were generally representative for Swedish GPs with regard to  
21 these characteristics (25).  
22  
23  
24  
25  
26  
27  
28  
29  
30  
31

## 32 **Scores**

33  
34  
35 Total scores – within and between the arms  
36  
37

38 After adjustment for the clusters (i.e. PHCCs) and mean scores at baseline, the mean  
39 scores in both intervention arms were significantly higher at 12 months than at  
40 baseline (CM: 10.34 vs 11.44; TL: 10.21 vs 10.91;  $p < 0.05$ ) (Figure 2). There was no  
41 statistically significant difference between the improvement in the CM and TL arms.  
42  
43 No significant changes in scoring over time were observed in the reference group. All  
44 the non-responders had significantly lower mean baseline scores than the  
45 responders (9.11 vs 10.47,  $p = 0.003$ ). At baseline, the GPs who worked at PHCCs in  
46 the most socially deprived areas (CNI 2.29-5.05, 21% of all GPs) had lower mean  
47 scores than the others (8.50 vs 10.32,  $p = 0.000$ ), and the non-responders in the  
48 deprived areas scored lowest of all non-responders (7.98 vs 9.71,  $p = 0.007$ ).  
49  
50  
51  
52  
53  
54  
55  
56  
57  
58  
59  
60

## Scores on individual questions – comparison of the arms

Table 2 compares the results for each of the 13 questions in the two intervention arms and the reference group by providing ORs of “scoring 1 or 2 points at 12 months.” The TL arm had a statistically significantly higher OR of “scoring 1 or 2 points at 12 months” than the reference group on two of the questions: the question about the follow-up of stable patients (question 9) and the question about multimorbidity in a patient with airway symptoms (question 13). On the question about smoking cessation support for patients who were motivated to quit smoking (question 6), the TL arm had a higher OR of “scoring 1 or 2 points at 12 months” than the CM arm. The CM arm’s ORs were not significantly higher for any of the questions than the TL arm or reference group’s ORs. Regarding the effects of intracluster conditions, we found three significant ICCs (questions 1, 10, and 12), all of them were approximately 0.10 (CIs could not be estimated because no standard error was available).

## Scores on individual questions – within the arms

For 10 of 13 questions, there was no significant difference between baseline and 12 months in the proportion of participants who scored 1 or 2 points and who scored 0 points (Figure 3). Scores on two questions improved significantly (CM arm, question 2, spirometry interpretation; TL arm, question 9, follow-up of stable patients), and scores on one question dropped significantly (reference group, question 13, multimorbidity in a patient with airway symptoms) (Figure 4a-c).

## **DISCUSSION**

### **Main findings**

1  
2  
3 The results of our study do not bear out the hypothesis that CM leads to greater  
4 improvements in GPs' level of COPD-related knowledge and skills than TL. However,  
5 the hypothesis that CM would be superior to no intervention was confirmed. Both CM  
6 and TL led to small, yet significant, improvements in Swedish GPs' levels of  
7 knowledge of COPD and COPD management skills. Neither of the CME methods  
8 was more effective than the other. GPs' baseline level of knowledge was low, and  
9 improvements at 12 months were generally modest.

10  
11  
12  
13  
14  
15  
16  
17  
18 Over time, strong areas of knowledge remained strong, and weak areas weak

19  
20  
21 For the most part, the differences between strong and weak areas of knowledge  
22 about COPD were maintained over time. We were not surprised by the high level of  
23 knowledge about smoking cessation support, as most GPs are well aware of and do  
24 not question the importance of quitting smoking. However, there is a gap between  
25 what GPs know and what they do: earlier research has shown that doctors rarely  
26 take active measures to help patients quit smoking (26). The preliminary results of a  
27 questionnaire to randomly selected COPD patients at the PHCCs participating in this  
28 study indicate that approximately 60% of the patients who are current smokers or  
29 have quit smoking in the last five years (n=382) state they have *not been offered*  
30 smoking cessation support, and 80% state they have *not been given* such support by  
31 their GPs or nurses (Sandelowsky, in manuscript). As the benefits of smoking  
32 cessation far outweigh the benefits of diagnosing new cases or providing  
33 pharmacological treatments for COPD (27), the GP's role as a motivator and  
34 authority in patient education should not be overlooked and needs continuous  
35 attention in CME situations.

36  
37  
38  
39  
40  
41  
42  
43  
44  
45  
46  
47  
48  
49  
50  
51  
52  
53  
54  
55  
56  
57  
58  
59  
60 Insufficient skills in spirometry interpretation may be one of the major causes of  
problems with implementing evidence-based COPD practice (28). CM involved active

1  
2  
3 participation in training spirometry interpretation and discussing spirometry results,  
4  
5 which may explain the improvements in responses to the question that measured  
6  
7 spirometry interpretation skills. However, this was the only question on spirometry  
8  
9 interpretation, and conclusions based on the responses to one question may not be  
10  
11 reliable. TL positively affected replies to the questions on smoking cessation support  
12  
13 to motivated patients, follow-up of patients with stable COPD, and management of  
14  
15 airway symptoms in multimorbid patients. We did not investigate whether this finding  
16  
17 was due to factors related to the CME leaders (i.e. uneven focus on the different  
18  
19 intended learning outcomes) or to the didactic lecturing style.  
20  
21

22  
23 Neither CME method led to significant improvements in managing COPD in patients  
24  
25 with multi- and comorbidities, managing acute exacerbation under time pressure,  
26  
27 managing patients who lack motivation to quit smoking, or handling patients whose  
28  
29 focus during the consultation is something other than COPD. Thus, these typical real-  
30  
31 life conditions and problems in Swedish primary care, which represent important  
32  
33 obstacles to implementing guidelines (19), remain difficult to overcome with two short  
34  
35 sessions of CME, regardless of whether lectures or case methods are used.  
36  
37  
38  
39  
40  
41

## 42 **Comparison with previous studies**

43  
44  
45 Kiessling et al found that using CM to implement evidence-based practice in primary  
46  
47 care was associated with decreased mortality in patients with coronary heart disease  
48  
49 in Sweden 10 years after the training had taken place (12). The educational meetings  
50  
51 in Kiessling's study were carried out similarly to those in our study; i.e., as short CM  
52  
53 seminars for GPs at their workplaces, led by an external facilitator. COPD may be a  
54  
55 more complex health issue than cardiovascular diseases, and evidence-based  
56  
57 management may thus be more complex to implement. The complexity of COPD  
58  
59



1  
2  
3 typically includes disabling comorbidities (1), confronting lifestyle choices (mainly  
4 smoking), low patient motivation to adhere to treatment (19, 29), GPs' negative views  
5 of COPD (19), consequences of COPD in patients' family lives (30), and the crucial  
6 role of interprofessional care (31).  
7  
8  
9

10  
11  
12 We are not alone in finding that CM sessions brief enough for busy GPs to attend  
13 are of limited effectiveness. A 2016 Swedish study about the effectiveness of CM in  
14 CME for GPs on the topic of childhood asthma used CM similar to those in our study.  
15  
16 That intervention had no effects on prescriptions of anti-asthmatic drugs for children  
17  
18  
19  
20  
21 (32).  
22

23  
24 In line with theories of adult learning, the American College of Chest Physicians  
25 recommends multiple teaching techniques, such as CM, audience response system,  
26 lectures, hands-on demonstrations, discussion groups, and role playing to effectively  
27 change physician knowledge, performance, and clinical outcomes (8). In fact, two  
28 previous CME studies from the United States, by Drexel et al and Adams et al, found  
29 that CME had positive effects on GPs' management of COPD when used as one of  
30 multiple educational methods, including a combination of short didactic lectures, case  
31 discussions, spirometry workshops, and inhaler demonstrations (13, 33). Moreover,  
32 Adams et al observed positive outcomes following interactive and collaborative CME  
33 for multidisciplinary participants, which is particularly relevant, as the current Swedish  
34 guidelines strongly recommend interprofessional COPD care (31). However, the  
35 follow-up measurements in both the Adams et al and Drexel et al studies were made  
36 shortly after the CME intervention and thus do not provide information about the  
37 sustainability of results. Additionally, in the Drexel et al study, no pre-intervention  
38 measurements were performed, which limits the researcher's ability to evaluate of the  
39 effects of the CME.  
40  
41  
42  
43  
44  
45  
46  
47  
48  
49  
50  
51  
52  
53  
54  
55  
56  
57  
58  
59  
60

## Methodological considerations

### Strengths and weaknesses

One strength of this study was the cluster randomization of the PHCCs, which reduced the likelihood of possible contamination across individuals at each PHCC (cluster). Including a reference group enabled us to compare knowledge gained through our interventions with information gained through other sources during the study period. Using a transition model in the analysis of data was a strength because of its simplicity. The statistically significant ICCs we found for the questions were higher than expected, indicating that intracluster conditions may have affected the GPs' results in some of the individual questions more than assumed prior to the intervention. This information may assist researchers conducting CRCTs in similar environments in the future. Our assessment indicated that there were practically no interactions between the clusters that could have biased the results.

Swedish GPs report they have little time for CME because of heavy workloads due to time constraints, staffing problems, and financial incentives at the PHCC that encourage multiple short visits (25). A previous study in a similar setting found that primary health care professionals appreciate CME outreach visits (34). The CME outreach visits in the current study were thus another strength, as they enabled the GPs to attend the CME sessions despite their busy schedules. Another strength was the choice to conduct the follow-up measurement 12 months after the intervention, which enabled us to describe the sustained effects of the interventions.

The recruitment of the reference group deviated from optimal CRCT design. Thus, some caution should be used when interpreting the results for the reference group.

1  
2  
3 Another limitation of our study was the potential for reporting bias at 12 months due  
4 to non-response. High non-response impaired the statistical power of the 12-month  
5 analysis and decreased our ability to generalize the results. A high drop-out  
6 percentage was also observed in the Adams et al CME study. The high drop-out  
7 rates in the two studies may reflect the strenuous working conditions GPs often  
8 experience: reminders had practically no effect on response rate. Non-responders  
9 may also have been uncomfortable reporting their potential lack of knowledge gain  
10 after the CME. Moreover, it was alarming to find that many of the non-responders  
11 worked in deprived urban areas where smoking and COPD are common (35, 36).  
12  
13  
14  
15  
16  
17  
18  
19  
20  
21  
22

23 A source of bias may have been the minor overlapping of the two pedagogical  
24 methods. Although we focused on providing didactic lectures in the TL sessions,  
25 some natural interplay may have taken place. On the other hand, CM consists of a  
26 mixture of didactic and participatory learning methods. The TL sessions were taught  
27 by four different CME leaders and the CM sessions were facilitated by one, which  
28 may have further biased the results, as the TL leaders may have stressed different  
29 content.  
30  
31  
32  
33  
34  
35  
36  
37  
38

39 We found GPs' baseline level of knowledge about COPD surprisingly low. Either a  
40 pilot survey prior to the intervention or designing the teaching activities after the  
41 baseline data were collected and analyzed could have improved the teaching  
42 activities.  
43  
44  
45  
46  
47

48 The GP questionnaire had strengths and limitations. A “think-aloud” discussion with a  
49 group of non-participating GPs helped us improve the five case vignettes'  
50 understandability and relatability, increasing the chances of valid replies to the  
51 questions. However, written descriptions, such as in case vignettes and multiple-  
52 choice answers, always involve a risk of misinterpretation, and thus of biased replies.  
53  
54  
55  
56  
57  
58  
59

1  
2  
3 We suspect this could have happened in question 8, as it was expressed in inverted  
4 (negative) wording. Another limitation of the study was that the questionnaire was the  
5 only assessment method we used, so we were unable to assess whether the GPs'  
6 behaviors changed in practice. The use of mixed methods would have helped ensure  
7 the best possible assessment validity (37). The narrow, 0-2 point scale, together with  
8 strict scoring requirements, may have contributed to difficulties in differentiating the  
9 participants' results. We tried to minimize the testing bias that can occur when the  
10 same questionnaire is administered twice by not revealing the answers and by using  
11 paper questionnaires to disable digital distribution of the questionnaire. Finally,  
12 participants may have received information about COPD through other channels  
13 during the study period.  
14  
15  
16  
17  
18  
19  
20  
21  
22  
23  
24  
25  
26

### 27 **Implications and future research**

28  
29  
30 The findings of this study can be useful in developing CME interventions that are  
31 feasible to implement in a busy primary care practice and that target the  
32 management of complex, chronic health issues (25, 38). The particularly low  
33 competence in the subject of COPD among GPs in socially deprived areas sends an  
34 important message to policymakers, as smoking and COPD are particularly prevalent  
35 in these areas (35, 36).  
36  
37  
38  
39  
40  
41  
42  
43

44 An evaluation of patient-related outcomes before and after the CME intervention is  
45 underway as a part of the PRIMAIR study. Future research could evaluate the effects  
46 of a sequel to our CME intervention that incorporates other educational methods  
47 and/or angles the focus towards interprofessional learning activities to support team-  
48 based COPD care in primary care. However, such interventions would likely need to  
49 be longer than two short sessions, which would make them challenging to implement  
50 in primary care. As many people now acquire knowledge via digital media, future  
51  
52  
53  
54  
55  
56  
57  
58  
59  
60

1  
2  
3 research could also investigate the effects of easy-to-access online handbooks and  
4 guides as support for GPs in clinical decision-making.  
5  
6  
7  
8  
9

## 10 **CONCLUSION**

11  
12  
13 GPs' levels of knowledge of and skills for COPD were low at baseline, and the effects  
14 of both case methods and traditional lectures were equally modest. Thus, these  
15 common educational methods alone may not be sufficient to substantially improve  
16 GPs' level of knowledge and management of COPD. Critics are justified in  
17 challenging the use of a single CME method in short sessions as a strategy for  
18 improving management of patients with COPD or other complex chronic diseases  
19 characterized by multimorbidity.  
20  
21  
22  
23  
24  
25  
26  
27  
28

## 29 **FUNDING DETAILS**

30  
31  
32 This work was supported by employment in and grants from the Stockholm County  
33 Council (grand register number LS 1110-1339, LS 1301-0078 and LS 1411-1373),  
34 employment in Dalarna County Council, and an unrestricted research grant from  
35 AstraZeneca Inc.  
36  
37  
38  
39  
40  
41

## 42 **AUTHORS' CONTRIBUTIONS**

43  
44  
45 Hanna Sandelowsky (HS), Ingvar Krakau (IK), Sonja Modin (SM), Björn Ställberg  
46 (BS), and Anna Nager (AN) conceived and designed the study. HS and BS were two  
47 of the five CME leaders. HS collected the data. HS, BS, Sven-Erik Johansson (SEJ),  
48 and AN analyzed the data. HS wrote the paper. All authors edited, revised, and  
49 approved the final manuscript.  
50  
51  
52  
53  
54  
55

## 56 **COMPETING INTERESTS**

1  
2  
3 HS has received honoraria for educational activities from Boehringer Ingelheim,  
4  
5 Novartis, AstraZeneca, and TEVA and an unrestricted research grant from  
6  
7 AstraZeneca. AN has received compensation for educational activities from  
8  
9 AstraZeneca and SM from Novartis. BS has received honoraria for educational  
10  
11 activities and lectures from AstraZeneca, Boehringer Ingelheim, GlaxoSmithKline,  
12  
13 Meda, , Novartis, and TEVA and has served on advisory boards arranged by  
14  
15 AstraZeneca, Novartis, Meda, TEVA, GlaxoSmithKline, and Boehringer Ingelheim. IK  
16  
17 and SEJ report no competing interests.  
18  
19

## 20 21 **ACKNOWLEDGEMENTS**

22  
23 The authors would like to thank Scientific Editor Kimberly Kane for useful comments  
24  
25 on the text and Senior Lecturer Ingrid Hylander for advice on the analysis of the  
26  
27 questionnaires.  
28  
29

## 30 31 32 33 34 35 36 37 38 39 **References**

- 40  
41  
42  
43 1. Stallberg B, Janson C, Johansson G, Larsson K, Stratelis G, Telg G, et  
44  
45 al. Management, morbidity and mortality of COPD during an 11-year period: an  
46  
47 observational retrospective epidemiological register study in Sweden (PATHOS).  
48  
49 Prim Care Respir J. 2014;23(1):38-45.  
50  
51 2. Global Initiative for Chronic Obstructive Lungdisease. 2013 [cited 17 Jan  
52  
53 2018]. Available from: [ttp://www.goldcopd.com/](http://www.goldcopd.com/)  
54  
55 3. Lindberg A, Bjerg A, Ronmark E, Larsson LG, Lundback B. Prevalence  
56  
57 and underdiagnosis of COPD by disease severity and the attributable fraction of  
58  
59

1  
2  
3 smoking Report from the Obstructive Lung Disease in Northern Sweden Studies.  
4  
5 Respir Med. 2006;100(2):264-72.  
6

7 4. Lisspers K, Johansson G, Jansson C, Larsson K, Stratelis G, Hedegaard  
8  
9 M, et al. Improvement in COPD management by access to asthma/COPD clinics in  
10  
11 primary care: Data from the observational PATHOS study. Respir Med. 2014  
12  
13 Sep;108(9):1345-54.  
14

15 5. Arne M, Emtner M, Lisspers K, Wadell K, Stallberg B. Availability of  
16  
17 pulmonary rehabilitation in primary care for patients with COPD: a cross-sectional  
18  
19 study in Sweden. Eur Clin Respir J. 2016;3:31601.  
20  
21

22 6. Lisspers K, Stallberg B, Hasselgren M, Johansson G, Svardsudd K.  
23  
24 Primary health care centres with asthma clinics: effects on patients knowledge and  
25  
26 asthma control. Prim Care Respir J. 2009;19(1):37-44.  
27

28 7. Pinnock H, Thomas M, Tsiligianni I, Lisspers K, Ostrem A, Stallberg B, et  
29  
30 al. The International Primary Care Respiratory Group (IPCRG) Research Needs  
31  
32 Statement 2010. Prim Care Respir J. 19 Suppl 1:S1-20.  
33  
34

35 8. Davis D, Galbraith R, American College of Chest Physicians H, Science  
36  
37 Policy C. Continuing medical education effect on practice performance: effectiveness  
38  
39 of continuing medical education: American College of Chest Physicians Evidence-  
40  
41 Based Educational Guidelines. Chest. 2009;135(3 Suppl):42S-8S.  
42  
43

44 9. Forsetlund L, Bjorndal A, Rashidian A, Jamtvedt G, O'Brien MA, Wolf F,  
45  
46 et al. Continuing education meetings and workshops: effects on professional practice  
47  
48 and health care outcomes. Cochrane Database Syst Rev. 2009(2):CD003030.  
49

50 10. Grimshaw JM, Eccles MP, Lavis JN, Hill SJ, Squires JE. Knowledge  
51  
52 translation of research findings. Implement Sci. 2012;7:50.  
53

54 11. Nordquist J. Att undervisa med case i utbildningar inom hälso- och  
55  
56 sjukvården. Stockholm: Karolinska Institutet, Medical Care Centre 2009.  
57  
58

- 1  
2  
3 12. Kiessling A, Lewitt M, Henriksson P. Case-based training of evidence-  
4 based clinical practice in primary care and decreased mortality in patients with  
5 coronary heart disease. *Ann Fam Med*. 2011;9(3):211-8.  
6  
7  
8  
9 13. Drexel C, Jacobson A, Hanania NA, Whitfield B, Katz J, Sullivan T.  
10 Measuring the impact of a live, case-based, multiformat, interactive continuing  
11 medical education program on improving clinician knowledge and competency in  
12 evidence-based COPD care. *Int J Chron Obstruct Pulmon Dis*. 2011;6:297-307.  
13  
14  
15  
16 14. Mauffette-Leenders LA, Erskine JA, Leenders MR. Learning with cases.  
17 London [Ont.]: Richard Ivey School of Business, The University of Western Ontario;  
18 1997.  
19  
20  
21  
22  
23 15. Campbell MK, Piaggio G, Elbourne DR, Altman DG. Consort 2010  
24 statement: extension to cluster randomised trials. *BMJ*. 2012;345:e5661.  
25  
26  
27  
28 16. Biggs John CT, editor. *Teaching for Quality Learning at University: The*  
29 McGraw-Hill Companies; 2011.  
30  
31  
32  
33 17. National Board of Health and Welfare. Socialstyrelsens riktlinjer för vård  
34 av astma och kroniskt obstruktiv lungsjukdom (KOL). Faktadokument och beslutsstöd  
35 för prioriteringar. 2004.  
36  
37  
38  
39  
40 18. Swedish Medical Products Agency. Läkemedelsverkets riktlinjer för  
41 behandling av kroniskt obstruktiv lungsjukdom. 2009 [cited 17 Jan 2018]. Available  
42 from: [https://lakemedelsverket.se/upload/halso-](https://lakemedelsverket.se/upload/halso-ochsjukvard/behandlingsrekommendationer/KOL_rek_webb.pdf)  
43 [ochsjukvard/behandlingsrekommendationer/KOL\\_rek\\_webb.pdf](https://lakemedelsverket.se/upload/halso-ochsjukvard/behandlingsrekommendationer/KOL_rek_webb.pdf)  
44  
45  
46  
47  
48 19. Sandelowsky H, Hylander I, Krakau I, Modin S, Stallberg B, Nager A.  
49 Time pressured deprioritization of COPD in primary care: a qualitative study. *Scand J*  
50 *Prim Health Care*. 2016:1-11.  
51  
52  
53  
54  
55  
56  
57  
58  
59  
60



- 1  
2  
3 20. Sundquist K, Malmstrom M, Johansson SE, Sundquist J. Care Need  
4 Index, a useful tool for the distribution of primary health care resources. *Journal of*  
5 *epidemiology and community health.* 2003;57(5):347-52.  
6  
7  
8  
9 21. Adams G, Gulliford MC, Ukoumunne OC, Eldridge S, Chinn S, Campbell  
10 MJ. Patterns of intra-cluster correlation from primary care research to inform study  
11 design and analysis. *J Clin Epidemiol.* 2004;57(8):785-94.  
12  
13  
14  
15 22. Killip S, Mahfoud Z, Pearce K. What is an intracluster correlation  
16 coefficient? Crucial concepts for primary care researchers. *Ann Fam Med.*  
17 2004;2(3):204-8.  
18  
19  
20  
21  
22 23. Hayes RJ MH. *Cluster Randomised Trials.* Boca Baton, FL: Chapman &  
23 Hall/CRC, Taylor & Francis Group; 2009.  
24  
25  
26 24. Sandelowsky H, Krakau I, Modin S, Stallberg B, Nager A. Case Method  
27 in COPD education for primary care physicians: study protocol for a cluster  
28 randomised controlled trial. *Trials.* 2017;18(1):197.  
29  
30  
31  
32 25. Pettersson S. [Swedish Medical Association's Primary Care Survey] In  
33 Swedish. Stockholm. Swedish Medical Association. 2015. p. 16-59.  
34  
35  
36  
37 26. Stead M, Angus K, Holme I, Cohen D, Tait G, Team PER. Factors  
38 influencing European GPs' engagement in smoking cessation: a multi-country  
39 literature review. *Br J Gen Pract.* 2009;59(566):682-90.  
40  
41  
42  
43 27. Black WC, Gareen IF, Soneji SS, Sicks JD, Keeler EB, Aberle DR, et al.  
44 Cost-effectiveness of CT screening in the National Lung Screening Trial. *N Engl J*  
45 *Med.* 2014;371(19):1793-802.  
46  
47  
48  
49 28. Foster JA, Yawn BP, Maziar A, Jenkins T, Rennard SI, Casebeer L.  
50 Enhancing COPD management in primary care settings. *MedGenMed.* 2007;9(3):24.  
51  
52  
53  
54  
55  
56  
57  
58  
59  
60

- 1  
2  
3 29. Roddy E, Antoniak M, Britton J, Molyneux A, Lewis S. Barriers and  
4 motivators to gaining access to smoking cessation services amongst deprived  
5 smokers--a qualitative study. *BMC Health Serv Res*. 2006;6:147.  
6  
7  
8  
9 30. Zakrisson AB, Theander K, Anderzen-Carlsson A. The experience of a  
10 multidisciplinary programme of pulmonary rehabilitation in primary health care from  
11 the next of kin's perspective: a qualitative study. *Prim Care Respir J*. 2013;22(4):459-  
12 65.  
13  
14  
15  
16  
17 31. National Board of Health and Welfare. Nationella riktlinjer vid vård av  
18 astma och KOL. 2015 [cited Jan 24 2018]. Available from:  
19 <http://www.socialstyrelsen.se/Lists/Artikelkatalog/Attachments/19949/2015-11-3.pdf>  
20  
21  
22  
23  
24 32. Ingemansson M. Evidence-based practice for children with asthma in  
25 primary care – quality of management and effects of learning Stockholm: Karolinska  
26 Institutet, Stockholm, Sweden; 2016.  
27  
28  
29  
30 33. Adams SG, Pitts J, Wynne J, Yawn BP, Diamond EJ, Lee S, et al. Effect  
31 of a primary care continuing education program on clinical practice of chronic  
32 obstructive pulmonary disease: translating theory into practice. *Mayo Clin Proc*.  
33 2012;87(9):862-70.  
34  
35  
36  
37  
38  
39 34. Berggren E, Odlund Olin A, Orrevall Y, Strang P, Johansson SE,  
40 Tornkvist L. Early palliative home care: Evaluation of an interprofessional educational  
41 intervention for district nurses and general practitioners about nutritional care. *SAGE*  
42 *open medicine*. 2017;5:2050312117726465.  
43  
44  
45  
46  
47  
48 35. Engstrom K, Magnusson C, Galanti MR. Socio-demographic, lifestyle  
49 and health characteristics among snus users and dual tobacco users in Stockholm  
50 County, Sweden. *BMC Public Health*. 2010;10:619.  
51  
52  
53  
54  
55  
56  
57  
58  
59  
60

- 1  
2  
3 36. Nacul LC, Soljak M, Meade T. Model for estimating the population  
4 prevalence of chronic obstructive pulmonary disease: cross sectional data from the  
5 Health Survey for England. *Popul Health Metr.* 2007;5:8.  
6  
7  
8  
9 37. Wass V, Van der Vleuten C, Shatzer J, Jones R. Assessment of clinical  
10 competence. *Lancet.* 2001;357(9260):945-9.  
11  
12  
13 38. Baron RJ. What's keeping us so busy in primary care? A snapshot from  
14 one practice. *N Engl J Med.* 2010;362(17):1632-6.  
15  
16  
17  
18  
19  
20  
21  
22  
23  
24  
25  
26  
27  
28  
29  
30  
31  
32  
33  
34  
35  
36  
37  
38  
39  
40  
41  
42  
43  
44  
45  
46  
47  
48  
49  
50  
51  
52  
53  
54  
55  
56  
57  
58  
59  
60

**Table 1. The main characteristics of the participants in the two intervention arms and reference group.**

| Main characteristics                              | Baseline    | 12 months                |                          |
|---------------------------------------------------|-------------|--------------------------|--------------------------|
|                                                   | All         | Responders               | Non-responders           |
| Participants                                      |             |                          |                          |
| n (%)                                             | 255 (100)   | 133 (52)                 | 126 (48)                 |
| Number of participants per PHCC, mean (range)     | 7.5 (2-15)  | 4.3 (1-10)               |                          |
| <b>Gender, n (%)</b>                              |             |                          |                          |
| Women                                             | 149 (58)    | 81 (61)                  | 68 (56)                  |
| <b>Age, mean (range)</b>                          | 47 (27-69)  | 47 (27-68)               | 47 (27-69)               |
| <b>Degree in family medicine, n (%)</b>           |             |                          |                          |
| Specialist in family medicine                     | 184 (72)    | 102 (77)                 | 82 (67)                  |
| Training to be a specialist in family medicine    | 71 (28)     | 31 (23)                  | 40 (33)                  |
| <b>Years worked in primary care, mean (range)</b> | 14 (0-41)   | 15 (0-37)                | 14 (0-41)                |
| <b>Asthma/COPD clinic at PHCC, n (%)</b>          |             |                          |                          |
| Yes                                               | 114 (45)    | 70 (53)                  | 51 (42)                  |
| <b>Ownership of PHCC</b>                          |             |                          |                          |
| Stockholm County Council                          | 132 (52)    | 71 (53)                  | 61 (50)                  |
| Private                                           | 123 (48)    | 62 (47)                  | 61 (50)                  |
| <b>CNI of PHCC's location, mean (SD)</b>          | 2.17 (0.78) | 2.03 <sup>1</sup> (0.67) | 2.32 <sup>1</sup> (0.86) |
| range                                             | 0.92-5.05   | 0.92-5.05                | 0.92-5.05                |

CNI, Care Need Index; COPD, chronic obstructive pulmonary disease; PHCC, primary health care center. The CNI is based on sociodemographic factors, including percentage of older adults living alone, children under age 5, unemployed people, people with low educational status, single parents, high mobility, and foreign-born people. High CNI = high sociodemographic burden; mean CNI in Stockholm County = 2.49.

<sup>1</sup>p of the difference between responders and non-responders <0.05

**Table 2.** Comparison of the odds ratios and 95% confidence intervals of scoring 1 or 2 rather than 0 points in the two intervention arms (case methods, CM; traditional lectures, TL) and the reference group (no continuing medical education) 12 months after the intervention. All measures are adjusted for clusters (primary health care centers) and total scores at baseline.

| Question                                    | Odds Ratio                                |                    |                 |                       |    |
|---------------------------------------------|-------------------------------------------|--------------------|-----------------|-----------------------|----|
|                                             | CM and TL vs. Reference group<br>[95% CI] |                    |                 | CM vs. TL<br>[95% CI] |    |
|                                             | CM                                        | TL                 | Reference group | CM                    | TL |
| 1. Diagnostic procedures                    | 0.55 [0.22 – 1.40]                        | 0.55 [0.21 – 1.42] | 1               | 1.00 [0.43 – 2.31]    | 1  |
| 2. Spirometry interpretation                | 1.29 [0.53 - 3.10]                        | 0.61 [0.24 - 1.55] | 1               | 2.10 [0.90– 4.95]     | 1  |
| 3. Smoking cessation (unmotivated patients) | N.A. <sup>1</sup>                         |                    |                 |                       |    |
| 4. Acute exacerbation (treatment)           | 1.40 [0.57 – 3.45]                        | 0.77 [0.31 – 1.96] | 1               | 1.81 [0.77– 4.24]     | 1  |
| 5. Acute exacerbation (follow-up)           | N.A. <sup>2</sup>                         |                    |                 |                       |    |
| 6. Smoking cessation (motivated patients)   | 0.41 [0.14 - 1.24]                        | 1.35 [0.39 – 4.69] | 1               | 0.30 [0.10 – 0.88]    | 1  |
| 7. Maintenance treatment                    | 1.04 [0.42 – 2.54]                        | 0.72 [0.30 - 1.74] | 1               | 1.44 [0.63 – 3.29]    | 1  |
| 8. Comorbidity: heart failure               | 2.46 [0.79 – 7.66]                        | 1.70 [0.61 - 4.95] | 1               | 1.45 [0.57 – 3.67]    | 1  |
| 9. Follow-up (stable patients)              | 2.37 [0.96 - 5.86]                        | 4.48 [1.51 – 13.3] | 1               | 0.53 [0.20 - 1.40]    | 1  |
| 10. Inter-professional interventions        | 1.82 [0.59 – 5.61]                        | 1.42 [0.45 – 4.49] | 1               | 1.29 [0.50 – 3.31]    | 1  |
| 11. Suspected respiratory failure           | 1.51 [0.62 - 3.72]                        | 0.97 [0.39 - 2.41] | 1               | 1.57 [0.68 - 3.62]    | 1  |
| 12. Multi-morbidity, no airway symptoms     | 1.36 [0.54 - 3.40]                        | 0.97 [0.39 – 2.43] | 1               | 1.39 [0.60 – 3.24]    | 1  |
| 13. Multi-morbidity, airway symptoms        | 1.34 [0.53 - 3.37]                        | 2.64 [1.06 - 6.60] | 1               | 0.51 [0.22 - 1.15]    | 1  |

<sup>1</sup>Odds ratios not applicable because there was no convergence in the model.

<sup>2</sup>Odds ratios not applicable because the model was questionable.

Figure 1. Study enrollment, general practitioner part of the PRIMAIR study.

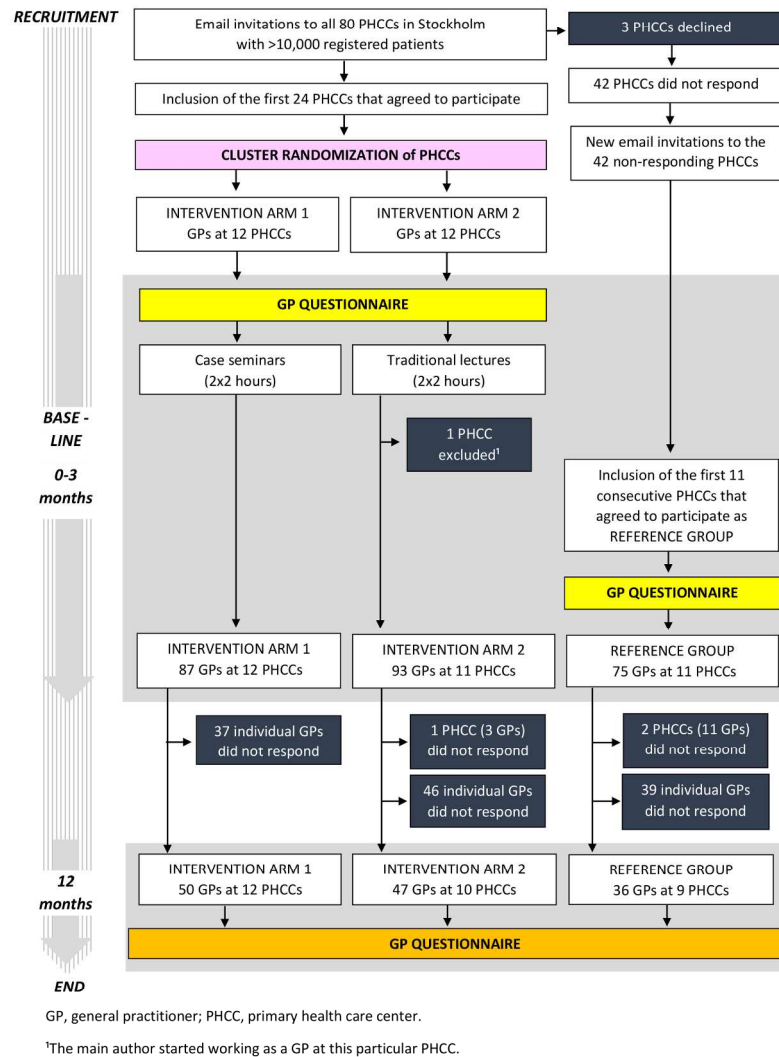

Figure 1. Study enrollment, general practitioner part of the PRIMAIR study.

165x233mm (300 x 300 DPI)

1  
2  
3  
4  
5  
6  
7  
8  
9  
10  
11  
12  
13  
14  
15  
16  
17  
18  
19  
20  
21  
22  
23  
24  
25  
26  
27  
28  
29  
30  
31  
32  
33  
34  
35  
36  
37  
38  
39  
40  
41  
42  
43  
44  
45  
46  
47  
48  
49  
50  
51  
52  
53  
54  
55  
56  
57  
58  
59  
60

**Figure 2.** Development of total scores in the two intervention arms and reference group over time. Total score minimum = 0 points, maximum = 26 points.

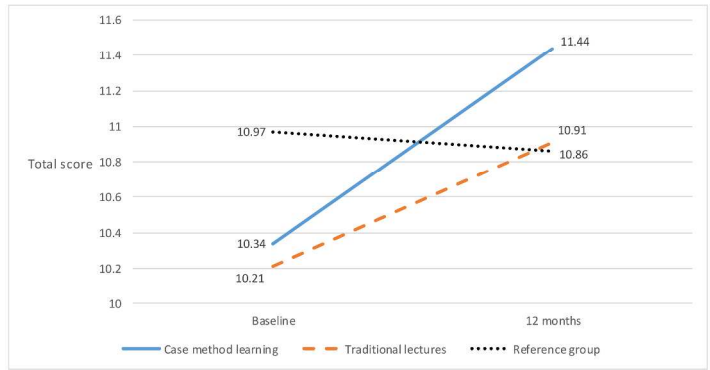

Figure 2. Development of total scores in the two intervention arms and reference group over time. Total score minimum = 0 points, maximum = 26 points.

233x330mm (600 x 600 DPI)

1  
2  
3  
4  
5  
6  
7  
8  
9  
10  
11  
12  
13  
14  
15  
16  
17  
18  
19  
20  
21  
22  
23  
24  
25  
26  
27  
28  
29  
30  
31  
32  
33  
34  
35  
36  
37  
38  
39  
40  
41  
42  
43  
44  
45  
46  
47  
48  
49  
50  
51  
52  
53  
54  
55  
56  
57  
58  
59  
60

**Figure 3.** Baseline results per question in the two intervention arms and reference group, presented as percent of participants who scored 1 or 2 points. Each response was given a score of between 0 and 2 points; the highest possible score was 2 points. On questions 2, 4, 7, 10, and 11, only two scores were possible: 0 or 2 points.

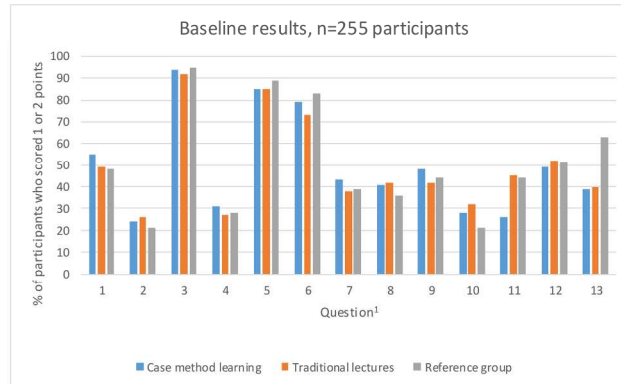

\*Questions: 1) Diagnostic procedures; 2) Spirometry interpretation; 3) Smoking cessation (unmotivated patients); 4) Treatment of acute exacerbation; 5) Follow-up of acute exacerbation; 6) Smoking cessation (motivated patients); 7) Maintenance treatment of COPD (GOLD B patients); 8) Heart failure medication for patients with COPD; 9) Follow-up of patients with stable COPD; 10) Inter-professional interventions; 11) Managing a suspected respiratory failure; 12) Multi-morbidity in COPD patients without obvious symptoms from airways or COPD comorbidities (an annual check-up); 13) Multi-morbidity in COPD patients with symptoms from airways and/or COPD comorbidities (an annual check-up)

Figure 3. Baseline results per question in the two intervention arms and reference group, presented as percent of participants who scored 1 or 2 points. Each response was given a score of between 0 and 2 points; the highest possible score was 2 points. On questions 2, 4, 7, 10, and 11, only two scores were possible: 0 or 2 points.

165x233mm (300 x 300 DPI)



**Figure 4a-c.** Changes over time in the scores per question in each group studied, presented as percent of participants who scored 1 or 2 points. Each response was given a score of between 0 and 2 points; the highest possible score was 2 points. On questions 2, 4, 7, 10, and 11, only two scores were possible: 0 or 2 points.

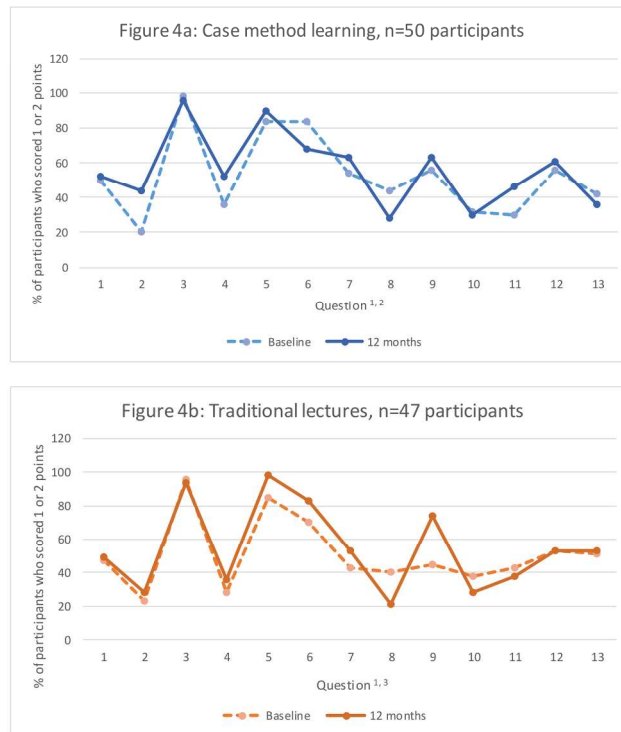

Figure 4a-c. Changes over time in the scores per question in each group studied, presented as percent of participants who scored 1 or 2 points. Each response was given a score of between 0 and 2 points; the highest possible score was 2 points. On questions 2, 4, 7, 10, and 11, only two scores were possible: 0 or 2 points.

165x233mm (300 x 300 DPI)

**Supplementary file 1.** The GP questionnaire, with the addition of the intended learning outcomes (light green arrows) and the scoring templates<sup>1</sup> (dark green arrows). The questionnaire and the scoring were based on the guidelines that were available prior to 2015<sup>1</sup>.

**Case 1**

*Your patient, a 59-year old male computer technician, comes to see you complaining of severe breathlessness in the past year, especially when exerting himself. He has attributed it to being unfit, since he doesn't like exercising. He has smoked for all his adult life. He also has a phlegmy morning cough. He has no known allergies and no pets. His children are worried about him, hence his appointment with you. He says his family go on at him about his smoking, but he has no intention of quitting.*

**Question 1** After a clinical examination, you suspect him of having COPD. Which of the following options (you may choose more than one answer) form part of your initial investigation of this patient?

|                                                                                                                                                                           |                         |                                                                              |
|---------------------------------------------------------------------------------------------------------------------------------------------------------------------------|-------------------------|------------------------------------------------------------------------------|
| <br> | a                       | PEF measurement                                                              |
|                                                                                                                                                                           | b                       | Spirometry                                                                   |
|                                                                                                                                                                           | c                       | Lung X-ray                                                                   |
|                                                                                                                                                                           | d                       | PEF curve                                                                    |
|                                                                                                                                                                           | e                       | NT-ProBNP                                                                    |
|                                                                                                                                                                           | f                       | BMI                                                                          |
|                                                                                                                                                                           | <b>ILOs<sup>2</sup></b> |                                                                              |
| <b>Scoring template</b>                                                                                                                                                   |                         | b+c+e = 2 points<br>b+c = 1 points<br>b+c+e+a = 1 points<br>b+c+a = 1 points |

*His spirometry reading:*

|          |              | Before bronchial dilation |             | After bronchial dilation |             |          |
|----------|--------------|---------------------------|-------------|--------------------------|-------------|----------|
| Variable | Normal value | Recorded value            | % of normal | Recorded value           | % of normal | % change |
| VC       | 5.2          | 3.5                       | 67          | 3.6                      | 69          | +3       |
| FVC      | 5.2          | 3.0                       | 58          | 3.0                      | 58          | +3       |
| FEV1     | 3.9          | 1.7                       | 44          | 2.0                      | 56          | +18      |
| FEV1/VC  | 0.75         | 0.49                      | 65          | 0.55                     | 73          | +12      |
| FEV1/FVC | 0.75         | 0.57                      | 76          | 0.67                     | 89          | +18      |

**Question 2** Going by his spirometry values, the most probable diagnosis is:  
 a Asthma

|    |                                                                                                                                                                                                                                                                                                                      |                                                                                                                                                                         |                                                                                                                                                                                            |
|----|----------------------------------------------------------------------------------------------------------------------------------------------------------------------------------------------------------------------------------------------------------------------------------------------------------------------|-------------------------------------------------------------------------------------------------------------------------------------------------------------------------|--------------------------------------------------------------------------------------------------------------------------------------------------------------------------------------------|
| 1  | b                                                                                                                                                                                                                                                                                                                    | COPD, stage 2                                                                                                                                                           |                                                                                                                                                                                            |
| 2  | c                                                                                                                                                                                                                                                                                                                    | Asthma and COPD, stage 2                                                                                                                                                |                                                                                                                                                                                            |
| 3  | d                                                                                                                                                                                                                                                                                                                    | COPD, stage 1                                                                                                                                                           |                                                                                                                                                                                            |
| 4  | e                                                                                                                                                                                                                                                                                                                    | Asthma and COPD, stage 3                                                                                                                                                |                                                                                                                                                                                            |
| 5  | f                                                                                                                                                                                                                                                                                                                    | COPD, stage 3                                                                                                                                                           |                                                                                                                                                                                            |
| 6  | g                                                                                                                                                                                                                                                                                                                    | Neither asthma nor COPD                                                                                                                                                 |                                                                                                                                                                                            |
| 7  |                                                                                                                                                                                                                                                                                                                      |                                                                                                                                                                         |                                                                                                                                                                                            |
| 8  |                                                                                                                                                                                                                                     | <b>ILOs</b>                                                                                                                                                             | Spirometry interpretation                                                                                                                                                                  |
| 9  |                                                                                                                                                                                                                                     | <b>Scoring template</b>                                                                                                                                                 | b = 2 points                                                                                                                                                                               |
| 10 |                                                                                                                                                                                                                                                                                                                      |                                                                                                                                                                         |                                                                                                                                                                                            |
| 11 | <b>Question 3</b>                                                                                                                                                                                                                                                                                                    | <b>How do you deal with his reluctance to quit smoking?</b>                                                                                                             |                                                                                                                                                                                            |
| 12 |                                                                                                                                                                                                                                                                                                                      | Write your answer here                                                                                                                                                  |                                                                                                                                                                                            |
| 13 |                                                                                                                                                                                                                                                                                                                      |                                                                                                                                                                         |                                                                                                                                                                                            |
| 14 |                                                                                                                                                                                                                                                                                                                      |                                                                                                                                                                         |                                                                                                                                                                                            |
| 15 |                                                                                                                                                                                                                                                                                                                      |                                                                                                                                                                         |                                                                                                                                                                                            |
| 16 |                                                                                                                                                                                                                                                                                                                      |                                                                                                                                                                         |                                                                                                                                                                                            |
| 17 |                                                                                                                                                                                                                                     | <b>ILOs</b>                                                                                                                                                             | Smoking cessation, unmotivated patients                                                                                                                                                    |
| 18 |                                                                                                                                                                                                                                                                                                                      |                                                                                                                                                                         |                                                                                                                                                                                            |
| 19 |                                                                                                                                                                                                                                     | <b>Scoring template</b>                                                                                                                                                 | Explain/inform about smoking and COPD = 1 point<br>Provide correct information about alternatives for supporting smoking cessation (e.g. motivational interviewing, medications) = 1 point |
| 20 |                                                                                                                                                                                                                                                                                                                      |                                                                                                                                                                         |                                                                                                                                                                                            |
| 21 |                                                                                                                                                                                                                                                                                                                      |                                                                                                                                                                         |                                                                                                                                                                                            |
| 22 |                                                                                                                                                                                                                                                                                                                      |                                                                                                                                                                         |                                                                                                                                                                                            |
| 23 |                                                                                                                                                                                                                                                                                                                      |                                                                                                                                                                         |                                                                                                                                                                                            |
| 24 |                                                                                                                                                                                                                                                                                                                      |                                                                                                                                                                         |                                                                                                                                                                                            |
| 25 |                                                                                                                                                                                                                                                                                                                      |                                                                                                                                                                         |                                                                                                                                                                                            |
| 26 | <b>Case II</b>                                                                                                                                                                                                                                                                                                       |                                                                                                                                                                         |                                                                                                                                                                                            |
| 27 | <i>You are the emergency doctor on duty today at your medical centre. A 59-year old female smoker arrives complaining of an increase in breathlessness, phlegm and expectoration over the past few days.</i>                                                                                                         |                                                                                                                                                                         |                                                                                                                                                                                            |
| 28 | <i>You see from her records that she has been registered to your colleague, who ordered a spirometric examination four years ago on account of the patient being a smoker and having a cough for which she sought medical attention. Spirometry revealed COPD with an FEV1 reading at 60% of the expected value.</i> |                                                                                                                                                                         |                                                                                                                                                                                            |
| 29 | <i>You also see that she had been prescribed an expectorant, a fast-acting beta-2 stimulant in dry powder inhaler form (with some repeat prescriptions) and antibiotics for a urinary infection.</i>                                                                                                                 |                                                                                                                                                                         |                                                                                                                                                                                            |
| 30 | <i>You can hear that she is breathless and obstructive and that she has a cold. She has a temperature of 37.1 degrees, a CRP of 26 and an oxygen saturation of 91%.</i>                                                                                                                                              |                                                                                                                                                                         |                                                                                                                                                                                            |
| 31 | <i>You send her for bronchial dilatory inhalations. She subsequently feels better and her saturation rises to 95%.</i>                                                                                                                                                                                               |                                                                                                                                                                         |                                                                                                                                                                                            |
| 32 |                                                                                                                                                                                                                                                                                                                      |                                                                                                                                                                         |                                                                                                                                                                                            |
| 33 |                                                                                                                                                                                                                                                                                                                      |                                                                                                                                                                         |                                                                                                                                                                                            |
| 34 |                                                                                                                                                                                                                                                                                                                      |                                                                                                                                                                         |                                                                                                                                                                                            |
| 35 |                                                                                                                                                                                                                                                                                                                      |                                                                                                                                                                         |                                                                                                                                                                                            |
| 36 |                                                                                                                                                                                                                                                                                                                      |                                                                                                                                                                         |                                                                                                                                                                                            |
| 37 |                                                                                                                                                                                                                                                                                                                      |                                                                                                                                                                         |                                                                                                                                                                                            |
| 38 |                                                                                                                                                                                                                                                                                                                      |                                                                                                                                                                         |                                                                                                                                                                                            |
| 39 |                                                                                                                                                                                                                                                                                                                      |                                                                                                                                                                         |                                                                                                                                                                                            |
| 40 |                                                                                                                                                                                                                                                                                                                      |                                                                                                                                                                         |                                                                                                                                                                                            |
| 41 |                                                                                                                                                                                                                                                                                                                      |                                                                                                                                                                         |                                                                                                                                                                                            |
| 42 | <b>Question 4</b>                                                                                                                                                                                                                                                                                                    | <b>With which of the following drugs do you choose to treat her current symptoms following the emergency bronchial dilation? (You may choose more than one answer.)</b> |                                                                                                                                                                                            |
| 43 |                                                                                                                                                                                                                                                                                                                      |                                                                                                                                                                         |                                                                                                                                                                                            |
| 44 |                                                                                                                                                                                                                                                                                                                      |                                                                                                                                                                         |                                                                                                                                                                                            |
| 45 |                                                                                                                                                                                                                                                                                                                      |                                                                                                                                                                         |                                                                                                                                                                                            |
| 46 |                                                                                                                                                                                                                                                                                                                      |                                                                                                                                                                         |                                                                                                                                                                                            |
| 47 |                                                                                                                                                                                                                                                                                                                      | a                                                                                                                                                                       | One dose of Betapred, 16 tablets                                                                                                                                                           |
| 48 |                                                                                                                                                                                                                                                                                                                      | b                                                                                                                                                                       | One dose Betapred, 8 tablets                                                                                                                                                               |
| 49 |                                                                                                                                                                                                                                                                                                                      | c                                                                                                                                                                       | Doxycylin (oral)                                                                                                                                                                           |
| 50 |                                                                                                                                                                                                                                                                                                                      | d                                                                                                                                                                       | Amoxicillin (oral)                                                                                                                                                                         |
| 51 |                                                                                                                                                                                                                                                                                                                      | e                                                                                                                                                                       | Phenoxymethylpenicillin (penicillin V)                                                                                                                                                     |
| 52 |                                                                                                                                                                                                                                                                                                                      | f                                                                                                                                                                       | Steroids, e.g. prednisolon 20-30 mg per day, orally for 5-10 days                                                                                                                          |
| 53 |                                                                                                                                                                                                                                                                                                                      | g                                                                                                                                                                       | Steroids, e.g. prednisolon 5-10 mg per day, orally for 5-10 days                                                                                                                           |
| 54 |                                                                                                                                                                                                                                                                                                                      | h                                                                                                                                                                       | Inhaled steroids, high dose for 14 days                                                                                                                                                    |
| 55 |                                                                                                                                                                                                                                                                                                                      |                                                                                                                                                                         |                                                                                                                                                                                            |
| 56 |                                                                                                                                                                                                                                   | <b>ILOs</b>                                                                                                                                                             | Pharmacological treatment of acute exacerbation                                                                                                                                            |
| 57 |                                                                                                                                                                                                                                                                                                                      |                                                                                                                                                                         |                                                                                                                                                                                            |
| 58 |                                                                                                                                                                                                                                   |                                                                                                                                                                         |                                                                                                                                                                                            |
| 59 |                                                                                                                                                                                                                                                                                                                      |                                                                                                                                                                         |                                                                                                                                                                                            |
| 60 |                                                                                                                                                                                                                                                                                                                      |                                                                                                                                                                         |                                                                                                                                                                                            |

|                                                                                     |                                                                                                   |                                                                                                                                                                                                                                                                                                                                                                          |
|-------------------------------------------------------------------------------------|---------------------------------------------------------------------------------------------------|--------------------------------------------------------------------------------------------------------------------------------------------------------------------------------------------------------------------------------------------------------------------------------------------------------------------------------------------------------------------------|
|                                                                                     | <b>Scoring template</b>                                                                           | (c or d) + f = 2 points                                                                                                                                                                                                                                                                                                                                                  |
| Question 5                                                                          | Do you feel this patient needs monitoring?<br>If yes, how?<br>If no, why not?                     |                                                                                                                                                                                                                                                                                                                                                                          |
|                                                                                     | Write your answer here                                                                            |                                                                                                                                                                                                                                                                                                                                                                          |
|    | <b>ILOs</b>                                                                                       | Follow-up of acute exacerbation ( <i>Managing issues with time pressure</i> )                                                                                                                                                                                                                                                                                            |
|    | <b>Scoring template</b>                                                                           | Propose a clinical follow-up carried out by a GP (not by a nurse) some weeks after an emergency visit = 1 point<br><br>Propose concrete actions at the follow-up (e.g. medication, investigations, symptom evaluations) = 1 point<br><br>Propose a follow-up time obviously too far in the future or 'over-investigating' with irrelevant methods = reduction of 1 point |
| Question 6                                                                          | She wants to quit smoking and asks for your help. What smoking cessation method do you recommend? |                                                                                                                                                                                                                                                                                                                                                                          |
|                                                                                     | Write your answer here                                                                            |                                                                                                                                                                                                                                                                                                                                                                          |
|  | <b>ILOs</b>                                                                                       | Smoking cessation, motivated patients ( <i>Local routines and practices in supporting smoking cessation</i> )                                                                                                                                                                                                                                                            |
|  | <b>Scoring template</b>                                                                           | Propose smoking cessation strategies that employ counseling and medications = 2 points<br><br>Nicotine replacement therapy only = 1 point<br><br>Counseling only = 1 point<br><br>Varenicline/bupropion without counseling = 0 points                                                                                                                                    |

**Case III**

You meet a 60-year old male patient with previously untreated COPD. Spirometry shows FEV1 at 71% of the expected value. The man quit smoking a couple of years ago and he has no medical history of acute exacerbation periods. He now experiences increasing breathlessness while out walking, gardening and doing other effortful activities.

|    |                                                                                     |                         |                                                                                                                                                                                                                                                    |
|----|-------------------------------------------------------------------------------------|-------------------------|----------------------------------------------------------------------------------------------------------------------------------------------------------------------------------------------------------------------------------------------------|
| 1  | <b>Question 7</b>                                                                   |                         | Which of the following treatment options would you recommend for this patient if you wish to start maintenance therapy? (You may choose more than one answer.)                                                                                     |
| 2  |                                                                                     | a                       | Only short-acting beta 2 stimulants as needed                                                                                                                                                                                                      |
| 3  |                                                                                     | b                       | Long-acting beta-2 stimulants                                                                                                                                                                                                                      |
| 4  |                                                                                     | c                       | Short-acting anticholinergics                                                                                                                                                                                                                      |
| 5  |                                                                                     | d                       | Long-acting anticholinergics                                                                                                                                                                                                                       |
| 6  |                                                                                     | e                       | A combination of long-acting beta-2 stimulants and long-acting anticholinergics                                                                                                                                                                    |
| 7  |                                                                                     | f                       | Inhaled steroids                                                                                                                                                                                                                                   |
| 8  |                                                                                     | g                       | A combination preparation of long-acting beta-2 stimulants and inhaled steroids (e.g. Symbicort Forte® or Seretide Forte®)                                                                                                                         |
| 9  |                                                                                     | h                       | Roflumilast (Daxas®)                                                                                                                                                                                                                               |
| 10 |                                                                                     | i                       | Acetylcysteine effervescent tablets                                                                                                                                                                                                                |
| 11 |    | <b>ILOs</b>             | Maintenance treatment of COPD (GOLD B patients)                                                                                                                                                                                                    |
| 12 |    | <b>Scoring template</b> | b = 2 points<br>alternatively d = 2 points<br>alternatively b+d = 2 points<br>alternatively e = 2 points                                                                                                                                           |
| 13 | <b>Question 8</b>                                                                   |                         | The patient also has heart failure, which is common in patients with COPD. When it comes to treating heart failure with beta blockers in a “normal case”, which of the following actions are <b>wrong</b> ? (You may choose more than one answer.) |
| 14 |                                                                                     | a                       | To opt for a beta-1 selective beta blocker, such as karvedidol (Kredex®)                                                                                                                                                                           |
| 15 |                                                                                     | b                       | To opt for a beta blocker as per the heart failure recommendations, e.g. metoprolol                                                                                                                                                                |
| 16 |                                                                                     | c                       | To opt for no beta blockers                                                                                                                                                                                                                        |
| 17 |                                                                                     | d                       | To opt for a beta blocker as in (b) and to increase the beta agonist (beta-2 stimulant) in inhaled form                                                                                                                                            |
| 18 |  | <b>ILOs</b>             | Heart failure medication for patients with COPD                                                                                                                                                                                                    |
| 19 |  | <b>Scoring template</b> | c+d = 2 points<br>c = 1 point                                                                                                                                                                                                                      |
| 20 | <b>Question 9</b>                                                                   |                         | When and how do you monitor the patient after your administration of maintenance therapy for COPD?                                                                                                                                                 |
| 21 |                                                                                     | Write your answer here  |                                                                                                                                                                                                                                                    |
| 22 |  | <b>ILOs</b>             | Follow-up of patients with stable COPD ( <i>Recognizing and prioritizing COPD patients without or with few airway symptoms</i> )                                                                                                                   |
| 23 |  | <b>Scoring template</b> | Mention a clinical follow-up with symptom evaluation = 1 point<br>Follow-up occurs 1–4 months after initiation of maintenance treatment for COPD = 1 point                                                                                         |

|  |                                                                                                              |
|--|--------------------------------------------------------------------------------------------------------------|
|  | Pulmonary X-ray and spirometry are not recommended as routine monitoring of treatment = reduction of 1 point |
|--|--------------------------------------------------------------------------------------------------------------|

**Case IV**

Your patient is a 65-year old female ex-smoker with stage 3 COPD. She has had a difficult year with three long exacerbation periods with obstructivity and has repeatedly received treatment from a hospital emergency unit and her local medical centre. In the past few years, she has met the centre's COPD nurse every six months or so. During a follow-up appointment, you find that she feels fine but has lost weight and loses her breath a little during conversation, especially directly after having walked some way down the corridor. Her saturation value is currently 93% and she has a BMI of 21.

|                    |                                                                                                                                                                            |                                                                                                                  |
|--------------------|----------------------------------------------------------------------------------------------------------------------------------------------------------------------------|------------------------------------------------------------------------------------------------------------------|
| <b>Question 10</b> | <b>What do you do? (You may choose more than one answer.)</b>                                                                                                              |                                                                                                                  |
|                    | a                                                                                                                                                                          | Refer her to the lung clinic                                                                                     |
|                    | b                                                                                                                                                                          | Refer her to the physiotherapist                                                                                 |
|                    | c                                                                                                                                                                          | Advise her to eat an extra energy-rich diet                                                                      |
|                    | d                                                                                                                                                                          | Refer her to a district nurse/dietician for a dietary consultation and prescribe a liquid nutritional supplement |
|                    | e                                                                                                                                                                          | Prescribe Physical Activity in the Prevention and Treatment of Disease (FYSS)                                    |
|                    | f                                                                                                                                                                          | Send her for an arterial blood gas test                                                                          |
|                    | g                                                                                                                                                                          | Check that she is on optimal medication                                                                          |
| →                  | <b>ILOs</b>                                                                                                                                                                | Interprofessional interventions ( <i>Local routines for interprofessional management of COPD</i> )               |
| →                  | <b>Scoring template</b>                                                                                                                                                    | b+c+d+g = 2 points<br>b+d+g = 2 points                                                                           |
| <b>Question 11</b> | <b>In which of the following situations would it be most appropriate for you to suspect respiratory insufficiency and send the patient for an arterial blood gas test?</b> |                                                                                                                  |
|                    | a                                                                                                                                                                          | The patient has started to experience exacerbations                                                              |
|                    | b                                                                                                                                                                          | The patient's FEV1 is < 40% of the expected value                                                                |
|                    | c                                                                                                                                                                          | The patient's saturation at rest is < 92%                                                                        |
|                    | d                                                                                                                                                                          | The patient's saturation drops to < 90 % on exertion                                                             |
|                    | e                                                                                                                                                                          | The patient's saturation drops to < 92% on exertion                                                              |
|                    | f                                                                                                                                                                          | The patient's saturation at rest is < 94%                                                                        |
|                    | g                                                                                                                                                                          | The patient feels the drugs are not helping                                                                      |
| →                  | <b>ILOs</b>                                                                                                                                                                | Managing suspected respiratory failure                                                                           |
| →                  | <b>Scoring template</b>                                                                                                                                                    | c = 2 points                                                                                                     |

**Case V**

A 70-year old male smoker with heart failure, hypertension, COPD, mild depression and chronic back pain came to see you a year ago. He is taking Spiriva®, Enalapril, Lasix Retard®, Metoprolol, Citalopram and Alvedon®, and has now come for his annual checkup. He seems to be in good health. You open the conversation by asking how he is.

Two possible scenarios now present themselves (A and B):

A) The patient says he's fine. He mainly wants to have a PSA test, renew his prescriptions and get help with his bad back.

**Question 12** How do you deal with the patient?

Write your answer here

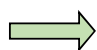**ILOs**

Multimorbidity in COPD patients without obvious symptoms from airways or COPD comorbidities (an annual check-up)

*(Patient or GP not becoming concerned about COPD because patient's agenda does not include airway symptoms.)*

*Managing multimorbidity and discussing COPD during limited consultation time.)*

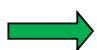**Scoring template**

Actively assess smoking status = 1 point

Actively assess any symptoms from airways and/or COPD comorbidities = 1 point

B) The patient says he has no energy and gets easily out of breath.

**Question 13** How do you deal with the patient?

Write your answer here

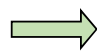**ILOs**

Multimorbidity in COPD patients with symptoms from airways and/or COPD comorbidities (an annual check-up)

*(Connected to question 12, managing even more complicated multimorbidity during limited consultation time. Prioritizing COPD with comorbidities in the consultation.)*

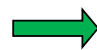**Scoring template**

All three of the following required for 2 points:

Testing for anemia, evaluating heart function (NT-pro-BNP or echocardiography), and taking a chest X-ray.

One of the above missing = reduction of 1 point (minimum score, 0 points).

BMI, body mass index; COPD, chronic obstructive pulmonary disease; CRP, C - reactive protein; FEV1, forced expiratory volume in 1 second; FVC, forced vital capacity; GP, general practitioner; ILOs, intended learning outcomes; PEF, peak expiratory flow; PSA, prostate specific antigen; VC, vital capacity

1           <sup>1</sup> The scoring templates were based on the pre-2015 Swedish COPD guidelines (reference 14)  
2           and the results of a qualitative study exploring the barriers to and facilitators of the COPD  
3           guideline implementation process (reference 15).  
4  
5  
6  
7  
8  
9  
10  
11  
12  
13  
14  
15  
16  
17  
18  
19  
20  
21  
22  
23  
24  
25  
26  
27  
28  
29  
30  
31  
32  
33  
34  
35  
36  
37  
38  
39  
40  
41  
42  
43  
44  
45  
46  
47  
48  
49  
50  
51  
52  
53  
54  
55  
56  
57  
58  
59  
60

For peer review only



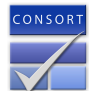

## CONSORT 2010 checklist of information to include when reporting a randomised trial\*

| Section/Topic                    | Item No | Checklist item                                                                                                                                                                              | Reported on page No                       |
|----------------------------------|---------|---------------------------------------------------------------------------------------------------------------------------------------------------------------------------------------------|-------------------------------------------|
| <b>Title and abstract</b>        |         |                                                                                                                                                                                             |                                           |
|                                  | 1a      | Identification as a randomised trial in the title                                                                                                                                           | 1                                         |
|                                  | 1b      | Structured summary of trial design, methods, results, and conclusions (for specific guidance see CONSORT for abstracts)                                                                     | 2                                         |
| <b>Introduction</b>              |         |                                                                                                                                                                                             |                                           |
| Background and objectives        | 2a      | Scientific background and explanation of rationale                                                                                                                                          | 5-6                                       |
|                                  | 2b      | Specific objectives or hypotheses                                                                                                                                                           | 6                                         |
| <b>Methods</b>                   |         |                                                                                                                                                                                             |                                           |
| Trial design                     | 3a      | Description of trial design (such as parallel, factorial) including allocation ratio                                                                                                        | 6-7                                       |
|                                  | 3b      | Important changes to methods after trial commencement (such as eligibility criteria), with reasons                                                                                          | N.A.                                      |
| Participants                     | 4a      | Eligibility criteria for participants                                                                                                                                                       | 6-7 + Figure 1                            |
|                                  | 4b      | Settings and locations where the data were collected                                                                                                                                        | 6                                         |
| Interventions                    | 5       | The interventions for each group with sufficient details to allow replication, including how and when they were actually administered                                                       | 7-9 +<br>(Reference 24: protocol article) |
| Outcomes                         | 6a      | Completely defined pre-specified primary and secondary outcome measures, including how and when they were assessed                                                                          | 7-8 + Suppl file 1                        |
|                                  | 6b      | Any changes to trial outcomes after the trial commenced, with reasons                                                                                                                       | N.A.                                      |
| Sample size                      | 7a      | How sample size was determined                                                                                                                                                              | 9                                         |
|                                  | 7b      | When applicable, explanation of any interim analyses and stopping guidelines                                                                                                                | N.A.                                      |
| <b>Randomisation:</b>            |         |                                                                                                                                                                                             |                                           |
| Sequence generation              | 8a      | Method used to generate the random allocation sequence                                                                                                                                      | 6                                         |
|                                  | 8b      | Type of randomisation; details of any restriction (such as blocking and block size)                                                                                                         | 6                                         |
| Allocation concealment mechanism | 9       | Mechanism used to implement the random allocation sequence (such as sequentially numbered containers), describing any steps taken to conceal the sequence until interventions were assigned | 6                                         |
| Implementation                   | 10      | Who generated the random allocation sequence, who enrolled participants, and who assigned participants to                                                                                   | 6 +                                       |

|                                                      |     |                                                                                                                                                   |                                  |
|------------------------------------------------------|-----|---------------------------------------------------------------------------------------------------------------------------------------------------|----------------------------------|
|                                                      |     | interventions                                                                                                                                     | (Reference 24: protocol article) |
|                                                      |     |                                                                                                                                                   | N.A.                             |
| Blinding                                             | 11a | If done, who was blinded after assignment to interventions (for example, participants, care providers, those assessing outcomes) and how          | N.A.                             |
|                                                      | 11b | If relevant, description of the similarity of interventions                                                                                       | N.A.                             |
| Statistical methods                                  | 12a | Statistical methods used to compare groups for primary and secondary outcomes                                                                     | 9-10                             |
|                                                      | 12b | Methods for additional analyses, such as subgroup analyses and adjusted analyses                                                                  | 9                                |
| <b>Results</b>                                       |     |                                                                                                                                                   |                                  |
| Participant flow (a diagram is strongly recommended) | 13a | For each group, the numbers of participants who were randomly assigned, received intended treatment, and were analysed for the primary outcome    | 10-11 + Figure 1                 |
|                                                      | 13b | For each group, losses and exclusions after randomisation, together with reasons                                                                  | 10-11 + Figure 1                 |
| Recruitment                                          | 14a | Dates defining the periods of recruitment and follow-up                                                                                           | 6 + Figure 1                     |
|                                                      | 14b | Why the trial ended or was stopped                                                                                                                | N.A.                             |
| Baseline data                                        | 15  | A table showing baseline demographic and clinical characteristics for each group                                                                  | 28 (Table 1)                     |
| Numbers analysed                                     | 16  | For each group, number of participants (denominator) included in each analysis and whether the analysis was by original assigned groups           | 10-11 + Figure 1                 |
| Outcomes and estimation                              | 17a | For each primary and secondary outcome, results for each group, and the estimated effect size and its precision (such as 95% confidence interval) | 11-12                            |
|                                                      | 17b | For binary outcomes, presentation of both absolute and relative effect sizes is recommended                                                       | N.A.                             |
| Ancillary analyses                                   | 18  | Results of any other analyses performed, including subgroup analyses and adjusted analyses, distinguishing pre-specified from exploratory         | 11                               |
| Harms                                                | 19  | All important harms or unintended effects in each group (for specific guidance see CONSORT for harms)                                             | N.A.                             |
| <b>Discussion</b>                                    |     |                                                                                                                                                   |                                  |
| Limitations                                          | 20  | Trial limitations, addressing sources of potential bias, imprecision, and, if relevant, multiplicity of analyses                                  | 16-18                            |
| Generalisability                                     | 21  | Generalisability (external validity, applicability) of the trial findings                                                                         | 17-19                            |
| Interpretation                                       | 22  | Interpretation consistent with results, balancing benefits and harms, and considering other relevant evidence                                     | 19                               |
| <b>Other information</b>                             |     |                                                                                                                                                   |                                  |
| Registration                                         | 23  | Registration number and name of trial registry                                                                                                    | 3                                |
| Protocol                                             | 24  | Where the full trial protocol can be accessed, if available                                                                                       | Reference 24                     |
| Funding                                              | 25  | Sources of funding and other support (such as supply of drugs), role of funders                                                                   | 19, 7                            |

1 \*We strongly recommend reading this statement in conjunction with the CONSORT 2010 Explanation and Elaboration for important clarifications on all the items. If relevant, we also  
2 recommend reading CONSORT extensions for cluster randomised trials, non-inferiority and equivalence trials, non-pharmacological treatments, herbal interventions, and pragmatic trials.  
3 Additional extensions are forthcoming: for those and for up to date references relevant to this checklist, see [www.consort-statement.org](http://www.consort-statement.org).  
4  
5  
6  
7  
8  
9  
10  
11  
12  
13  
14  
15  
16  
17  
18  
19  
20  
21  
22  
23  
24  
25  
26  
27  
28  
29  
30  
31  
32  
33  
34  
35  
36  
37  
38  
39  
40  
41  
42

For peer review only

# BMJ Open

## Effectiveness of traditional lectures and case methods in Swedish general practitioners' continuing medical education about COPD: a cluster randomized controlled trial

|                                 |                                                                                                                                                                                                                                                                                                                                                                                                                                                                                                                                                                                                                                                          |
|---------------------------------|----------------------------------------------------------------------------------------------------------------------------------------------------------------------------------------------------------------------------------------------------------------------------------------------------------------------------------------------------------------------------------------------------------------------------------------------------------------------------------------------------------------------------------------------------------------------------------------------------------------------------------------------------------|
| Journal:                        | <i>BMJ Open</i>                                                                                                                                                                                                                                                                                                                                                                                                                                                                                                                                                                                                                                          |
| Manuscript ID                   | bmjopen-2018-021982.R1                                                                                                                                                                                                                                                                                                                                                                                                                                                                                                                                                                                                                                   |
| Article Type:                   | Research                                                                                                                                                                                                                                                                                                                                                                                                                                                                                                                                                                                                                                                 |
| Date Submitted by the Author:   | 27-Apr-2018                                                                                                                                                                                                                                                                                                                                                                                                                                                                                                                                                                                                                                              |
| Complete List of Authors:       | Sandelowsky, Hanna; Karolinska Institute, NVS, Section for Family Medicine and Primary Care; Academic Primary Health Care Centre, Krakau, Ingvar ; Karolinska Institutet, Department of Medicine, Division of Clinical Epidemiology<br>Modin, Sonja; Karolinska Institutet, NVS, Section for Family Medicine and Primary Care<br>Ställberg, Björn; Uppsala University, Department of Public Health and Caring Sciences, Family Medicine and Preventive Medicine<br>Johansson, Sven-Erik; Karolinska Institute, NVS, Section for Family Medicine and Primary Care<br>Nager, Anna; Karolinska Institute, NVS, Section for Family Medicine and Primary Care |
| <b>Primary Subject Heading</b>: | Medical education and training                                                                                                                                                                                                                                                                                                                                                                                                                                                                                                                                                                                                                           |
| Secondary Subject Heading:      | General practice / Family practice, Medical education and training, Respiratory medicine                                                                                                                                                                                                                                                                                                                                                                                                                                                                                                                                                                 |
| Keywords:                       | cluster randomized controlled trial, professional training, continuing medical education, case method learning, traditional lectures, general practitioner                                                                                                                                                                                                                                                                                                                                                                                                                                                                                               |
|                                 |                                                                                                                                                                                                                                                                                                                                                                                                                                                                                                                                                                                                                                                          |

SCHOLARONE™  
Manuscripts

1  
2  
3 **Effectiveness of traditional lectures and case methods in Swedish**  
4  
5 **general practitioners' continuing medical education about COPD: a**  
6  
7 **cluster randomized controlled trial**  
8  
9

10  
11 Hanna Sandelowsky<sup>1,2</sup>, MD, PhD student, [hanna.sandelowsky@ki.se](mailto:hanna.sandelowsky@ki.se), +46738902565  
12

13  
14 Ingvar Krakau<sup>1,3</sup>, MD, associate professor, [ingvar.krakau@ki.se](mailto:ingvar.krakau@ki.se), +46707774332  
15

16  
17 Sonja Modin<sup>1</sup>, MD, PhD, [sonja.modin@gmail.com](mailto:sonja.modin@gmail.com), +46706534806  
18

19  
20 Björn Stållberg<sup>4</sup>, MD, associate professor, [b.stallberg@telia.com](mailto:b.stallberg@telia.com), +46703149944  
21

22  
23 Sven-Erik Johansson<sup>1,2</sup>, professor, [sven-erik.johansson@ki.se](mailto:sven-erik.johansson@ki.se), +46708583505  
24

25  
26 Anna Nager<sup>1</sup>, MD, PhD, [anna@nager.se](mailto:anna@nager.se), +46707422317  
27  
28  
29

- 30  
31 1. Karolinska Institutet, NVS, Section for Family Medicine and Primary Care,  
32 Alfred Nobels Allé 23, SE-14183 Huddinge, Stockholm, Sweden  
33  
34 2. Academic Primary Health Care Centre, Stockholm County Council,  
35 Solnavägen 1 E, Box 45436, SE-104 31 Stockholm, Sweden  
36  
37 3. Karolinska Institutet, Department of Medicine, Division of Clinical  
38 Epidemiology, SE-171 76 Stockholm, Sweden  
39  
40 4. Uppsala University, Department of Public Health and Caring Sciences, Family  
41 Medicine and Preventive Medicine, Box 564, SE-751 22 Uppsala, Sweden  
42  
43  
44  
45  
46

47  
48 **Correspondence to:** [hanna.sandelowsky@ki.se](mailto:hanna.sandelowsky@ki.se)  
49

50  
51 **Word count:** 4485  
52  
53  
54  
55  
56  
57  
58  
59  
60

## ABSTRACT

**Objectives:** To study the effects of continuing medical education (CME) about chronic obstructive pulmonary disease (COPD) for GPs by comparing two commonly used CME methods with each other and no CME (reference group).

**Design:** A pragmatic cluster randomized controlled trial with primary health care centers (PHCCs) as units of randomization.

**Setting, participants and interventions:** 24 PHCCs in Stockholm County, Sweden, were randomized into two CME intervention arms: case method learning (CM) (n=12) and traditional lectures (TL) (n=12). A reference group without CME (n=11) was recruited separately. GPs (n=255) participated in the study arm to which their PHCC was allocated: CM, n=87; TL, n=93; and reference, n=75. Two 2-hour CME seminars were given in a period of 3 months.

**Primary outcome measures:** Changes in scores between baseline and 12 months on a 13-item questionnaire about evidence-based COPD management (0-2 points/question, maximum total score 26 points).

**Results:** 133 (52%) GPs completed the questionnaire both at baseline and 12 months. Both CM and TL resulted in small yet significantly higher total scores at 12 months than at baseline (CM, 10.34 vs 11.44; TL, 10.21 vs 10.91;  $p<0.05$ ); there were few significant differences between these CME methods. At both baseline and 12 months, all three groups' scores were generally high on questions about smoking cessation support and low on those that measured spirometry interpretation skills, interprofessional care, and management of multimorbidity.

**Conclusions:** Neither short CM nor short TL CME sessions substantially improve GPs' skills in managing COPD. It is justified to challenge the use of these common CME methods as a strategy for improving GPs' level of knowledge about

1  
2  
3 management of COPD and other complex chronic diseases characterized by  
4  
5 multimorbidity.  
6

7 **Trial registration:** Clinicaltrials.gov, 10 August 2014, Identifier NCT02213809.  
8

9  
10 **Funding:** Stockholm and Dalarna County Councils.  
11

12  
13  
14 **Keywords:** continuing medical education, professional training, case method  
15  
16 learning, traditional lectures, primary care physicians, COPD, chronic diseases,  
17  
18 primary care, cluster randomized controlled trial.  
19  
20  
21  
22  
23  
24  
25  
26  
27  
28  
29  
30  
31  
32  
33  
34  
35  
36  
37  
38  
39  
40  
41  
42  
43  
44  
45  
46  
47  
48  
49  
50  
51  
52  
53  
54  
55  
56  
57  
58  
59  
60

## STRENGTHS AND LIMITATIONS OF THIS STUDY

- The educational interventions (2x2-hour traditional lectures and case-based seminars) studied in this cluster randomized controlled trial are frequently used in real-life Swedish primary care, which strengthens the relevance of this study.
- The cluster design of study was a strength, since it decreased potential bias from contamination across individuals at each primary health care center.
- The follow-up investigation 12 months after the intervention was a strength, as it permitted us to observe the effects of the educational interventions beyond the immediate post-study period.
- The main limitation of the study was the large percentage of non-responders at the end, which significantly impaired the ability to draw conclusions.
- Using a written test of knowledge (the GP questionnaire) to assess the effects of the educational interventions was not optimal because it did not assess change in GPs' behaviors and because the scaling was narrow, decreasing the chances of clear distribution of the scores, which in turn led to few statistically significant changes in the scores.



## INTRODUCTION

Chronic obstructive pulmonary disease (COPD) is often comorbid with other conditions and is generally underdiagnosed and insufficiently managed in primary care (1). Despite improvements in recent years, primary care personnel can still contribute to delays in COPD diagnosis and care through insufficient actions to prevent, detect, and manage the disease (1-4).

In Sweden, the majority of patients with COPD are managed in primary care by general practitioners (GPs), who typically work together with other GPs in group practices and often in co-operation with specialized asthma/COPD nurses and pulmonary rehabilitation personnel (4, 5). As GPs are usually the patient's first professional health care contact, their knowledge about and skills in COPD management need to be up-to-date (6). However, there is a considerable gap between current COPD guidelines and what is actually done at GPs' practices. To help transfer theory into practice, more studies on the implementation of COPD guidelines are needed (7).

Continuing medical education (CME) is a necessary step in implementing optimal care. Although modern research stresses the effectiveness of multiple educational methods in CME (8-10), Swedish GPs still often sign up for 1-2 hour lectures, possibly because of their busy schedules. Traditional lectures (TL) are carried out mainly in didactic style with a CME leader as an academic expert. CME that uses case method learning (CM) can be carried out in similar settings and in a similar amounts of time as TL, but the CME leader uses an interactive teaching approach. The professional's perspective on the case described is a central feature in the discussions (11). When used in CME in primary care settings, CM has a positive impact on learning (12, 13). In a typical CM seminar, a CME leader facilitates the

1  
2  
3 discussion of one to two patient cases. CM stimulates creative thinking,  
4  
5 communication, tolerance for different views, the ability to defend one's own point of  
6  
7 view with logic, analysis, and decision making (14). It is a learning method that  
8  
9 requires previous knowledge and clinical experience in the subject and maturity in the  
10  
11 participants.  
12

13  
14 The current study is part of the PRIMAIR study, a cluster-randomized controlled trial  
15  
16 (CRCT) at primary health care centers (PHCC) in Stockholm County in 2014-2017.

17  
18 The overall objective of PRIMAIR pertained to the effects of CME on professional  
19  
20 COPD practice of individual GPs (GP-related outcomes) and the effects of CME on  
21  
22 individual patients (patient-related outcomes). This paper presents only the GP-  
23  
24 related outcomes. A detailed description of the GPs' baseline results has been  
25  
26 published previously (15).  
27

28  
29  
30 The aim of the current study was to compare the effects of CME on the topic of  
31  
32 COPD, delivered in the form of praxis-typical, short (1-2 hour) sessions of either CM  
33  
34 or TL, tailored for and targeted to GPs. The hypothesis was that CME based on CM  
35  
36 leads to greater improvements in GPs' level of knowledge about and skills in COPD  
37  
38 management than TL or no CME.  
39  
40  
41  
42  
43

## 44 **METHODS**

45  
46  
47 This paper was written in line with the 2010 Consolidated Standards of Reporting  
48  
49 Trials (CONSORT) statement: extension to cluster randomized trials (16). The  
50  
51 CONSORT checklist (Supplementary file 1) and flow chart (Figure 1) were used.  
52  
53

54  
55 Using a computer randomization program, the authors randomized 24 PHCCs  
56  
57 (clusters) in Stockholm, Sweden, into two intervention arms: a CM arm and a TL arm.  
58

1  
2  
3 A reference group of 11 PHCCs (no CME) was recruited separately and was not  
4 randomized, as the PHCCs in this group would not receive CME. The GPs  
5 participated in the study arm to which their PHCC was allocated.  
6  
7  
8  
9

10 The pharmaceutical industry did not participate in any part of the study, and we did  
11 not offer financial incentives to the participants. As there are no formal requirements  
12 for CME for GPs in Sweden, educational credits were not offered.  
13  
14  
15

16  
17 The CME sessions took place at the PHCCs. Five CME leaders, all GPs competent  
18 and experienced in COPD management, ran two 2-hour sessions at each PHCC.  
19

20 The two sessions took place a maximum of 3 months apart. Each PHCC was  
21 assigned the same CME leader and CME method (either CM or TL). Thus, four TL  
22 leaders taught at two to four PHCCs each, and one CM leader taught at all 12  
23 PHCCs that received CM. John Biggs' educational theory of constructive alignment  
24 (17) was used to align the intended learning outcomes, learning activities, and  
25 assessments. The intended learning outcomes of the CME were derived from the  
26 pre-2015 COPD guidelines (2, 18, 19) and from a 2013 qualitative study of GPs in  
27 Stockholm that described barriers to and facilitators of the COPD guideline  
28 implementation process (20). Each leader adhered to the intended learning  
29 outcomes, but the learning activities differed in the CM and LT intervention groups.  
30  
31  
32  
33  
34  
35  
36  
37  
38  
39  
40  
41  
42

43 The leaders were also allowed to use their own presentation materials, such as slide  
44 shows and handouts. Apart from a short didactic introduction, participant activating  
45 methods (discussions) were the main method of used in the CM sessions, whereas  
46 the TL sessions followed a traditional didactic style.  
47  
48  
49  
50  
51

52 The outcome measures for the GPs pertained to individual participants. A GP  
53 questionnaire, constructed by the authors and improved after a "think-aloud"  
54 discussion with a group of non-participating GPs, was used to assess GPs' level of  
55  
56  
57  
58  
59  
60

1  
2  
3 knowledge. The paper format questionnaire consisted of five short patient case  
4 vignettes and two to three questions per vignette (13 in total). The questions were  
5 about “knowledge/skills” and “practical management” and consisted of a mixture of  
6 multiple choice and open questions. The participants could score 0, 1, or 2 points per  
7 question. Responses were scored with a premade scoring template. GPs completed  
8 the questionnaires immediately prior to and 12 months after the CME sessions,  
9 taking 20 to 30 minutes each time. At baseline, the GPs replied to the questionnaire  
10 on their own without consulting each other. The GPs in the intervention arms did so  
11 at the first CME session, and the GPs in the reference group did so at a staff  
12 meeting. At 12 months, most GPs, regardless of study arm, filled in the questionnaire  
13 at an ordinary staff meeting. All did so individually. The few GPs who were not  
14 present at the staff meeting were contacted by telephone or email and reminded  
15 twice. They were allowed to complete the questionnaire on their own. The  
16 completed GP questionnaires did not include any information that could identify the  
17 GP, so the assessors were blind to cluster allocation.

18  
19  
20  
21  
22  
23  
24  
25  
26  
27  
28  
29  
30  
31  
32  
33  
34  
35  
36 The GP questionnaire with a summary of the intended learning outcomes and the  
37 scoring template is found in Supplementary data file 2.

38  
39  
40  
41 Information about GPs’ gender, age, years in the profession, and degree (specialist  
42 in family medicine or in training to become one) was gathered at baseline. Other  
43 information gathered at baseline included data on the PHCC where they worked,  
44 such as ownership (county council or private), whether there was a nurse-led  
45 asthma/COPD clinic at the PHCC, and sociodemographic characteristics of the  
46 PHCC’s catchment area (Care Need Index [CNI]) (21). The CNI is a deprivation index  
47 based on sociodemographic factors, including percentage of older adults living alone,  
48 children under age 5, unemployed people, people with low educational status, single  
49  
50  
51  
52  
53  
54  
55  
56  
57  
58  
59  
60

1  
2  
3 parents, high mobility, and foreign-born people. A high CNI score indicates high  
4  
5 sociodemographic burden. The mean CNI score PHCC catchment areas in  
6  
7 Stockholm County is 2.49.  
8  
9

10 GP sample size was determined by the power calculation of the patient sample size  
11  
12 in the PRIMAIR Study, which was determined to be 230 patients with COPD in GOLD  
13  
14 stages 2 to 3 (2) in each arm. To keep the number of clusters reasonable, we chose  
15  
16 to invite only PHCCs with more than 10,000 registered patients (n=80). We estimated  
17  
18 that 10 to 12 PHCCs were needed per arm to achieve sufficient statistical power for  
19  
20 the patient sample. Accordingly, the number of GPs was determined by the number  
21  
22 of PHCCs we included. Unequal cluster sizes (5 to 10 GPs) were expected because  
23  
24 of variations in staff numbers at baseline and dropouts at 12 months. The intraclass  
25  
26 correlation coefficient (ICC) was set at 0.01 based on earlier studies on cluster  
27  
28 randomizations in primary care (22-24).  
29  
30  
31

### 32 **Statistics**

34 We performed the statistical analysis with STATA, version 14 (Stata Corp. 2015.  
35  
36 Stata Statistical Software: Release 14. College Station, TX: Stata Corp. LP) and  
37  
38 SPSS, version 23 (PSP (IBM Corp. Released 2013. IBM SPSS Statistics for  
39  
40 Windows, Version 23.0. Armonk, NY: IBM Corp.). We computed summary statistics  
41  
42 such as means, proportions, and measures with standard parametric methods. We  
43  
44 used a McNemar test to compare matched pairs of scores per question at baseline  
45  
46 and 12 months for proportions of GPs who scored “0 points” vs “1 or 2 points.” We  
47  
48 used clttest and xtreg (adjusting for cluster) to analyze differences in total scores  
49  
50 within the study arms and for adjusting for “total scores at baseline,” “CNI,” and  
51  
52 “years in profession.” A transition model, adjusted for clusters, was applied to analyze  
53  
54 associations between items (“0 points” or “1 or 2 points”) and study arms at baseline  
55  
56  
57  
58  
59  
60

1  
2  
3 and 12 months, which also provided odds ratios (ORs) and their 95% confidence  
4 intervals (CIs). In a transition model the outcome variable at a previous time point is  
5 included as a fixed effect covariate. We condition the response at time j on the  
6 response at time j-1. ICC was estimated by xtlogit. P-values <0.05 were considered  
7 indicative of statistical significance.  
8  
9  
10  
11  
12

13  
14 A detailed description of the methodology and interventions is found in the study  
15 protocol (25).  
16  
17  
18

## 19 **Ethics**

20  
21  
22 The present CRCT, including a model consent form and other related documentation  
23 given to participants, was approved by the Regional Ethical Review Board of  
24 Stockholm (ref 2013/232-31/5). Prior to enrollment, all PHCC managers provided  
25 written informed consent to be involved in the study. All GPs provided written  
26 informed consent to participate in the study after they had been allocated to the  
27 different study arms (after cluster randomization). The study was registered at  
28 www.clinicaltrials.gov on 10 August 2014, Identifier NCT02213809. The first  
29 participant was enrolled 14 August 2014.  
30  
31  
32  
33  
34  
35  
36  
37  
38  
39

## 40 **Patient and Public Involvement**

41  
42 No patients or public were involved in the study.  
43  
44  
45  
46  
47  
48

## 49 **RESULTS**

### 50 **Description of the participants**

51  
52  
53 At baseline, 207 GPs attended the CME sessions. Twenty-seven of them did not  
54 agree to participate in the study and thus did not fill in the GP questionnaire. In the  
55  
56  
57  
58  
59

1  
2  
3 CM arm, 87 of 100 GPs (87%), in the TL arm, 93 of 107 GPs (87%) agreed to  
4 participate in the study. The reference group consisted of 75 GPs. The majority of the  
5 GPs who did not agree to participate worked at a PHCC without a nurse-led  
6 asthma/COPD clinic. They did not differ from the participants regarding age, gender,  
7 years in profession, educational degree, or PHCC's CNI scores or ownership form.  
8  
9

10  
11  
12  
13  
14 Of the 255 participants who responded to the questionnaire at baseline, 122 (48%)  
15 did not respond again at 12 months ("non-responders"). The remaining 133 GPs  
16 were the final participants ("responders"). There were no significant differences  
17 between any of the groups studied (the two intervention arms and the reference  
18 group) in the proportions of responders and non-responders. A higher percentage of  
19 the non-responders than responders were employed at PHCCs in socially deprived  
20 areas of Stockholm ( $p < 0.05$ ). The characteristics of the responders and non-  
21 responders are seen in Table 1.  
22  
23  
24  
25  
26  
27  
28  
29  
30

31  
32 A higher percentage of GPs in the CM arm than the TL arm and the reference group  
33 worked at a PHCC with a nurse-led asthma/COPD clinic (64% vs 36%-38%,  
34  $p = 0.012$ ). A higher percentage of GPs in the reference group than the CM and TL  
35 arms worked at privately run PHCCs (72% vs 32%-42%,  $p = 0.001$ ). The means for  
36 gender, age, years in profession, and CNI scores did not differ significantly between  
37 the GPs in the groups studied (the two intervention arms and the reference group),  
38 and the participants were generally representative for Swedish GPs with regard to  
39 these characteristics (26).  
40  
41  
42  
43  
44  
45  
46  
47  
48  
49

## 50 Scores

51  
52  
53 Total scores – within and between the arms  
54  
55  
56  
57  
58  
59  
60

1  
2  
3 After adjustment for the clusters (i.e. PHCCs) and mean scores at baseline, the mean  
4 scores in both intervention arms were significantly higher at 12 months than at  
5 baseline (CM: 10.34 vs 11.44; TL: 10.21 vs 10.91;  $p<0.05$ ) (Figure 2). There was no  
6 statistically significant difference between the improvement in the CM and TL arms.  
7  
8 No significant changes in scoring over time were observed in the reference group. All  
9 the non-responders had significantly lower mean baseline scores than the  
10 responders (9.11 vs 10.47,  $p=0.003$ ). At baseline, the GPs who worked at PHCCs in  
11 the most socially deprived areas (CNI 2.29-5.05, 21% of all GPs) had lower mean  
12 scores than the others (8.50 vs 10.32,  $p=0.000$ ), and the non-responders in the  
13 deprived areas scored lowest of all non-responders (7.98 vs 9.71,  $p=0.007$ ). Scores  
14 were unrelated to whether or not there was a nurse-led asthma/COPD clinic at the  
15 PHCC.  
16  
17  
18  
19  
20  
21  
22  
23  
24  
25  
26  
27  
28  
29

30 Scores on individual questions – comparison of the arms

31  
32 Table 2 compares the results for each of the 13 questions in the two intervention  
33 arms and the reference group by providing ORs of “scoring 1 or 2 points at 12  
34 months.” The TL arm had a statistically significantly higher OR of “scoring 1 or 2  
35 points at 12 months” than the reference group on two of the questions: the question  
36 about the follow-up of stable patients (question 9) and the question about  
37 multimorbidity in a patient with airway symptoms (question 13). On the question  
38 about smoking cessation support for patients who were motivated to quit smoking  
39 (question 6), the TL arm had a higher OR of “scoring 1 or 2 points at 12 months” than  
40 the CM arm. The CM arm’s ORs were not significantly higher for any of the questions  
41 than the TL arm or reference group’s ORs. Regarding the effects of intracluster  
42 conditions, we found three significant ICCs (questions 1, 10, and 12), all of them  
43  
44  
45  
46  
47  
48  
49  
50  
51  
52  
53  
54  
55  
56  
57  
58  
59  
60



1  
2  
3 were approximately 0.10 (CIs could not be estimated because no standard error was  
4  
5 available).

6  
7  
8 Scores on individual questions – within the arms

9  
10  
11 For 10 of 13 questions, there was no significant difference between baseline and 12  
12 months in the proportion of participants who scored 1 or 2 points and who scored 0  
13 points (Figure 3). Scores on two questions improved significantly (CM arm, question  
14  
15 2, spirometry interpretation; TL arm, question 9, follow-up of stable patients), and  
16  
17 scores on one question dropped significantly (reference group, question 13,  
18  
19 multimorbidity in a patient with airway symptoms) (Figure 4a-c).  
20  
21  
22  
23  
24  
25  
26

## 27 **DISCUSSION**

### 28 29 **Main findings**

30  
31  
32  
33 The results of our study do not bear out the hypothesis that CM leads to greater  
34  
35 improvements in GPs' level of COPD-related knowledge and skills than TL. However,  
36  
37 the hypothesis that CM would be superior to no intervention was confirmed. Both CM  
38  
39 and TL led to small, yet significant, improvements in Swedish GPs' levels of  
40  
41 knowledge of COPD and COPD management skills. Neither of the CME methods  
42  
43 was more effective than the other. GPs' baseline level of knowledge was low, and  
44  
45 improvements at 12 months were generally modest. Moreover, GPs' level of  
46  
47 knowledge was unrelated to whether or not they worked at a PHCC with a nurse-led  
48  
49 asthma/COPD clinic,  
50  
51

52  
53 **Over time, strong areas of knowledge remained strong, and weak areas weak**  
54  
55  
56  
57  
58  
59  
60

1  
2  
3 For the most part, the differences between strong and weak areas of knowledge  
4 about COPD were maintained over time. We were not surprised by the high level of  
5 knowledge about smoking cessation support, as most GPs are well aware of and do  
6 not question the importance of quitting smoking. However, there is a gap between  
7 what GPs know and what they do: earlier research has shown that doctors rarely  
8 take active measures to help patients quit smoking (27). The preliminary results of a  
9 questionnaire to randomly selected COPD patients at the PHCCs participating in this  
10 study indicate that approximately 60% of the patients who are current smokers or  
11 have quit smoking in the last five years (n=382) state they have *not been offered*  
12 smoking cessation support, and 80% state they have *not been given* such support by  
13 their GPs or nurses (Sandelowsky, in manuscript). As the benefits of smoking  
14 cessation far outweigh the benefits of diagnosing new cases or providing  
15 pharmacological treatments for COPD (28), the GP's role as a motivator and  
16 authority in patient education should not be overlooked and needs continuous  
17 attention in CME situations.  
18  
19  
20  
21  
22  
23  
24  
25  
26  
27  
28  
29  
30  
31  
32  
33  
34  
35

36 Insufficient skills in spirometry interpretation may be one of the major causes of  
37 problems with implementing evidence-based COPD practice (29). CM involved active  
38 participation in training spirometry interpretation and discussing spirometry results,  
39 which may explain the improvements in responses to the question that measured  
40 spirometry interpretation skills. However, this was the only question on spirometry  
41 interpretation, and conclusions based on the responses to one question may not be  
42 reliable. TL positively affected replies to the questions on smoking cessation support  
43 to motivated patients, follow-up of patients with stable COPD, and management of  
44 airway symptoms in multimorbid patients. We did not investigate whether this finding  
45 was due to factors related to the CME leaders (i.e. uneven focus on the different  
46 intended learning outcomes) or to the didactic lecturing style.  
47  
48  
49  
50  
51  
52  
53  
54  
55  
56  
57  
58  
59  
60

1  
2  
3 Neither CME method led to significant improvements in managing COPD in patients  
4 with multi- and comorbidities, managing acute exacerbation under time pressure,  
5  
6 managing patients who lack motivation to quit smoking, or handling patients whose  
7  
8 focus during the consultation is something other than COPD. Thus, these typical real-  
9  
10 life conditions and problems in Swedish primary care, which represent important  
11  
12 obstacles to implementing guidelines (20), remain difficult to overcome with two short  
13  
14 sessions of CME, regardless of whether lectures or case methods are used.  
15  
16  
17  
18  
19  
20

### 21 **Comparison with previous studies**

22  
23  
24 Kiessling et al found that using CM to implement evidence-based practice in primary  
25  
26 care was associated with decreased mortality in patients with coronary heart disease  
27  
28 in Sweden 10 years after the training had taken place (12). The educational meetings  
29  
30 in Kiessling's study were carried out similarly to those in our study; i.e., as short CM  
31  
32 seminars for GPs at their workplaces, led by an external facilitator. COPD may be a  
33  
34 more complex health issue than cardiovascular diseases, and evidence-based  
35  
36 management may thus be more complex to implement. The complexity of COPD  
37  
38 typically includes disabling comorbidities (1), confronting lifestyle choices (mainly  
39  
40 smoking), low patient motivation to adhere to treatment (20, 30), GPs' negative views  
41  
42 of COPD (20), consequences of COPD in patients' family lives (31), and the crucial  
43  
44 role of interprofessional care (32).  
45  
46  
47  
48

49 We are not alone in finding that CM sessions brief enough for busy GPs to attend  
50  
51 are of limited effectiveness. A 2016 Swedish study about the effectiveness of CM in  
52  
53 CME for GPs on the topic of childhood asthma used CM similar to those in our study.  
54  
55 That intervention had no effects on prescriptions of anti-asthmatic drugs for children  
56  
57 (33).  
58  
59  
60

1  
2  
3 In line with theories of adult learning, the American College of Chest Physicians  
4 recommends multiple teaching techniques, such as CM, audience response system,  
5 lectures, hands-on demonstrations, discussion groups, and role playing to effectively  
6 change physician knowledge, performance, and clinical outcomes (8). In fact, two  
7 previous CME studies from the United States, by Drexel et al and Adams et al, found  
8 that CME had positive effects on GPs' management of COPD when used as one of  
9 multiple educational methods, including a combination of short didactic lectures, case  
10 discussions, spirometry workshops, and inhaler demonstrations (13, 34). Moreover,  
11 Adams et al observed positive outcomes following interactive and collaborative CME  
12 for multidisciplinary participants, which is particularly relevant, as the current Swedish  
13 guidelines strongly recommend interprofessional COPD care (32). However, the  
14 follow-up measurements in both the Adams et al and Drexel et al studies were made  
15 shortly after the CME intervention and thus do not provide information about the  
16 sustainability of results. Additionally, in the Drexel et al study, no pre-intervention  
17 measurements were performed, which limits the researcher's ability to evaluate of the  
18 effects of the CME.  
19  
20  
21  
22  
23  
24  
25  
26  
27  
28  
29  
30  
31  
32  
33  
34  
35  
36  
37  
38  
39  
40

## 41 **Methodological considerations**

### 42 **Strengths and weaknesses**

43  
44  
45  
46  
47 One strength of this study was the cluster randomization of the PHCCs, which  
48 reduced the likelihood of possible contamination across individuals at each PHCC  
49 (cluster). Including a reference group enabled us to compare knowledge gained  
50 through our interventions with information gained through other sources during the  
51 study period. Using a transition model in the analysis of data was a strength because  
52 of its simplicity. The statistically significant ICCs we found for the questions were  
53  
54  
55  
56  
57  
58  
59  
60

1  
2  
3 higher than expected, indicating that intracluster conditions may have affected the  
4  
5 GPs' results in some of the individual questions more than assumed prior to the  
6  
7 intervention. This information may assist researchers conducting CRCTs in similar  
8  
9 environments in the future. Our assessment indicated that there were practically no  
10  
11 interactions between the clusters that could have biased the results.  
12  
13

14 Swedish GPs report they have little time for CME because of heavy workloads due to  
15  
16 time constraints, staffing problems, and financial incentives at the PHCC that  
17  
18 encourage multiple short visits (26). A previous study in a similar setting found that  
19  
20 primary health care professionals appreciate CME outreach visits (35). The CME  
21  
22 outreach visits in the current study were thus another strength, as they enabled the  
23  
24 GPs to attend the CME sessions despite their busy schedules. Another strength was  
25  
26 the choice to conduct the follow-up measurement 12 months after the intervention,  
27  
28 which enabled us to describe the sustained effects of the interventions.  
29  
30  
31

32 The recruitment of the reference group deviated from optimal CRCT design. Thus,  
33  
34 some caution should be used when interpreting the results for the reference group.  
35  
36 Another limitation of our study was the potential for reporting bias at 12 months due  
37  
38 to non-response. High non-response impaired the statistical power of the 12-month  
39  
40 analysis and decreased our ability to generalize the results. A high drop-out  
41  
42 percentage was also observed in the Adams et al CME study. The high drop-out  
43  
44 rates in the two studies may reflect the strenuous working conditions GPs often  
45  
46 experience: reminders had practically no effect on response rate. Non-responders  
47  
48 may also have been uncomfortable reporting their potential lack of knowledge gain  
49  
50 after the CME. Moreover, it was alarming to find that many of the non-responders  
51  
52 worked in deprived urban areas where smoking and COPD are common (36, 37).  
53  
54  
55  
56  
57  
58  
59  
60

1  
2  
3 A source of bias may have been the minor overlapping of the two pedagogical  
4 methods. Although we focused on providing didactic lectures in the TL sessions,  
5 some natural interplay may have taken place. On the other hand, CM consists of a  
6 mixture of didactic and participatory learning methods. The TL sessions were taught  
7 by four different CME leaders and the CM sessions were facilitated by one, which  
8 may have further biased the results, as the TL leaders may have stressed different  
9 content.  
10  
11  
12  
13  
14  
15  
16  
17

18 To achieve deeper knowledge via CM, participants must have previous knowledge  
19 and clinical experience in the subject area. Analysis indicated that GPs' baseline  
20 level of knowledge about COPD was surprisingly low. We reason that it may have  
21 been too low to enable them to take full advantage of the CM learning  
22 opportunity. Thus, a sequence of different CME interventions in which CM was not  
23 the first step might have been more effective. In retrospect, we could have improved  
24 the teaching activities by conducting a pilot survey to measure GPs' knowledge prior  
25 to designing the intervention or by designing the teaching activities after collecting  
26 and analyzing the baseline data.  
27  
28  
29  
30  
31  
32  
33  
34  
35  
36  
37  
38

39 The GP questionnaire had strengths and limitations. A "think-aloud" discussion with a  
40 group of non-participating GPs helped us improve the five case vignettes'  
41 understandability and relatability, increasing the chances of valid replies to the  
42 questions. However, written descriptions, such as in case vignettes and multiple-  
43 choice answers, always involve a risk of misinterpretation, and thus of biased replies.  
44 We suspect this could have happened in question 8, as it was expressed in inverted  
45 (negative) wording. Another limitation of the study was that the questionnaire was the  
46 only assessment method we used, so we were unable to assess whether the GPs'  
47 behaviors changed in practice. The use of mixed methods would have helped ensure  
48  
49  
50  
51  
52  
53  
54  
55  
56  
57  
58  
59  
60

1  
2  
3 the best possible assessment validity (38). The narrow, 0-2 point scale, together with  
4  
5 strict scoring requirements, may have contributed to difficulties in differentiating the  
6  
7 participants' results. We tried to minimize the testing bias that can occur when the  
8  
9 same questionnaire is administered twice by not revealing the answers and by using  
10  
11 paper questionnaires to disable digital distribution of the questionnaire. Finally,  
12  
13 participants may have received information about COPD through other channels  
14  
15 during the study period.  
16

### 17 18 **Implications and future research** 19

20  
21 The findings of this study can be useful in developing CME interventions that are  
22  
23 feasible to implement in a busy primary care practice and that target the  
24  
25 management of complex, chronic health issues (26, 39). The particularly low  
26  
27 competence in the subject of COPD among GPs in socially deprived areas sends an  
28  
29 important message to policymakers, as smoking and COPD are particularly prevalent  
30  
31 in these areas (36, 37).  
32  
33

34  
35 An evaluation of patient-related outcomes before and after the CME intervention is  
36  
37 underway as a part of the PRIMAIR study. Future research could evaluate the effects  
38  
39 of a sequel to our CME intervention that incorporates other educational methods  
40  
41 and/or angles the focus towards interprofessional learning activities to support team-  
42  
43 based COPD care in primary care. However, such interventions would likely need to  
44  
45 be longer than two short sessions, which would make them challenging to implement  
46  
47 in primary care. As many people now acquire knowledge via digital media, future  
48  
49 research could also investigate the effects of easy-to-access online handbooks and  
50  
51 guides as support for GPs in clinical decision-making.  
52  
53  
54  
55  
56  
57  
58  
59  
60

## CONCLUSION

GPs' levels of knowledge of and skills for COPD were low at baseline, and the effects of both case methods and traditional lectures were equally modest. Thus, these common educational methods alone may not be sufficient to substantially improve GPs' level of knowledge and management of COPD. Critics are justified in challenging the use of a single CME method in short sessions as a strategy for improving management of patients with COPD or other complex chronic diseases characterized by multimorbidity.

## FUNDING DETAILS

This work was supported by employment in and grants from the Stockholm County Council (grand register number LS 1110-1339, LS 1301-0078 and LS 1411-1373), employment in Dalarna County Council, and an unrestricted research grant from AstraZeneca Inc.

## DATA SHARING STATEMENT

Data analyzed in this study are available from the corresponding author in response to requests that comply with ethical principles of good research.

## AUTHORS' CONTRIBUTIONS

Hanna Sandelowsky (HS), Ingvar Krakau (IK), Sonja Modin (SM), Björn Ställberg (BS), and Anna Nager (AN) conceived and designed the study. HS and BS were two of the five CME leaders. HS collected the data. HS, BS, Sven-Erik Johansson (SEJ), and AN analyzed the data. HS wrote the paper. All authors edited, revised, and approved the final manuscript.

## COMPETING INTERESTS



1  
2  
3 HS has received honoraria for educational activities from Boehringer Ingelheim,  
4  
5 Novartis, AstraZeneca, and TEVA and an unrestricted research grant from  
6  
7 AstraZeneca. AN has received compensation for educational activities from  
8  
9 AstraZeneca and SM from Novartis. BS has received honoraria for educational  
10  
11 activities and lectures from AstraZeneca, Boehringer Ingelheim, GlaxoSmithKline,  
12  
13 Meda, Novartis, and TEVA and has served on advisory boards arranged by  
14  
15 AstraZeneca, Novartis, Meda, TEVA, GlaxoSmithKline, and Boehringer Ingelheim. IK  
16  
17 and SEJ report no competing interests.  
18  
19

## 20 21 **ACKNOWLEDGEMENTS**

22  
23 The authors would like to thank Scientific Editor Kimberly Kane for useful comments  
24  
25 on the text and Senior Lecturer Ingrid Hylander for advice on the analysis of the  
26  
27 questionnaires.  
28  
29

## 30 31 32 33 34 35 36 37 38 39 **References**

- 40  
41  
42  
43 1. Stallberg B, Janson C, Johansson G, Larsson K, Stratelis G, Telg G, et  
44  
45 al. Management, morbidity and mortality of COPD during an 11-year period: an  
46  
47 observational retrospective epidemiological register study in Sweden (PATHOS).  
48  
49 Prim Care Respir J. 2014;23(1):38-45.  
50  
51 2. Global Initiative for Chronic Obstructive Lungdisease. 2013 [cited 17 Jan  
52  
53 2018]. Available from: [ttp://www.goldcopd.com/](http://www.goldcopd.com/)  
54  
55 3. Lindberg A, Bjerg A, Ronmark E, Larsson LG, Lundback B. Prevalence  
56  
57 and underdiagnosis of COPD by disease severity and the attributable fraction of  
58  
59

- 1  
2  
3 smoking Report from the Obstructive Lung Disease in Northern Sweden Studies.  
4  
5 Respir Med. 2006;100(2):264-72.  
6  
7 4. Lisspers K, Johansson G, Jansson C, Larsson K, Stratelis G, Hedegaard  
8  
9 M, et al. Improvement in COPD management by access to asthma/COPD clinics in  
10  
11 primary care: Data from the observational PATHOS study. Respir Med. 2014  
12  
13 Sep;108(9):1345-54.  
14  
15 5. Arne M, Emtner M, Lisspers K, Wadell K, Stallberg B. Availability of  
16  
17 pulmonary rehabilitation in primary care for patients with COPD: a cross-sectional  
18  
19 study in Sweden. Eur Clin Respir J. 2016;3:31601.  
20  
21  
22 6. Lisspers K, Stallberg B, Hasselgren M, Johansson G, Svardsudd K.  
23  
24 Primary health care centres with asthma clinics: effects on patients knowledge and  
25  
26 asthma control. Prim Care Respir J. 2009;19(1):37-44.  
27  
28  
29 7. Pinnock H, Thomas M, Tsiligianni I, Lisspers K, Ostrem A, Stallberg B, et  
30  
31 al. The International Primary Care Respiratory Group (IPCRG) Research Needs  
32  
33 Statement 2010. Prim Care Respir J. 2019;19(Suppl 1):S1-20.  
34  
35  
36 8. Davis D, Galbraith R, American College of Chest Physicians H, Science  
37  
38 Policy C. Continuing medical education effect on practice performance: effectiveness  
39  
40 of continuing medical education: American College of Chest Physicians Evidence-  
41  
42 Based Educational Guidelines. Chest. 2009;135(3 Suppl):42S-8S.  
43  
44  
45 9. Forsetlund L, Bjorndal A, Rashidian A, Jamtvedt G, O'Brien MA, Wolf F,  
46  
47 et al. Continuing education meetings and workshops: effects on professional practice  
48  
49 and health care outcomes. Cochrane Database Syst Rev. 2009(2):CD003030.  
50  
51  
52 10. Grimshaw JM, Eccles MP, Lavis JN, Hill SJ, Squires JE. Knowledge  
53  
54 translation of research findings. Implement Sci. 2012;7:50.  
55  
56  
57 11. Nordquist J. Att undervisa med case i utbildningar inom hälso- och  
58  
59 sjukvården. . Stockholm: : Karolinska Institutet, Medical Care Centre 2009.  
60

- 1  
2  
3 12. Kiessling A, Lewitt M, Henriksson P. Case-based training of evidence-  
4 based clinical practice in primary care and decreased mortality in patients with  
5 coronary heart disease. *Ann Fam Med*. 2011;9(3):211-8.  
6  
7  
8  
9 13. Drexel C, Jacobson A, Hanania NA, Whitfield B, Katz J, Sullivan T.  
10 Measuring the impact of a live, case-based, multiformat, interactive continuing  
11 medical education program on improving clinician knowledge and competency in  
12 evidence-based COPD care. *Int J Chron Obstruct Pulmon Dis*. 2011;6:297-307.  
13  
14  
15  
16  
17 14. Mauffette-Leenders LA, Erskine JA, Leenders MR. Learning with cases.  
18 London [Ont.]: Richard Ivey School of Business, The University of Western Ontario;  
19 1997.  
20  
21  
22  
23  
24 15. Sandelowsky H, Natalishvili N, Krakau I, Modin S, Stallberg B, Nager A.  
25 COPD management by Swedish general practitioners - baseline results of the  
26 PRIMAIR study. *Scand J Prim Health Care*. 2018:1-9.  
27  
28  
29  
30  
31 16. Campbell MK, Piaggio G, Elbourne DR, Altman DG. Consort 2010  
32 statement: extension to cluster randomised trials. *BMJ*. 2012;345:e5661.  
33  
34  
35 17. Biggs John CT, editor. Teaching for Quality Learning at University: The  
36 McGraw-Hill Companies; 2011.  
37  
38  
39 18. National Board of Health and Welfare. Socialstyrelsens riktlinjer för vård  
40 av astma och kroniskt obstruktiv lungsjukdom (KOL). Faktadokument och beslutsstöd  
41 förprioriteringar. 2004.  
42  
43  
44  
45  
46 19. Swedish Medical Products Agency. Läkemedelsverkets riktlinjer för  
47 behandling av kroniskt obstruktiv lungsjukdom. 2009 [cited 17 Jan 2018]. Available  
48 from: [https://lakemedelsverket.se/upload/halso-och-  
49 sjukvard/behandlingsrekommendationer/KOL\\_rek\\_webb.pdf](https://lakemedelsverket.se/upload/halso-och-sjukvard/behandlingsrekommendationer/KOL_rek_webb.pdf)  
50  
51  
52  
53  
54  
55  
56  
57  
58  
59  
60

- 1  
2  
3 20. Sandelowsky H, Hylander I, Krakau I, Modin S, Stallberg B, Nager A.  
4  
5 Time pressured deprioritization of COPD in primary care: a qualitative study. *Scand J*  
6  
7 *Prim Health Care*. 2016;1-11.  
8
- 9 21. Sundquist K, Malmstrom M, Johansson SE, Sundquist J. Care Need  
10  
11 Index, a useful tool for the distribution of primary health care resources. *Journal of*  
12  
13 *epidemiology and community health*. 2003;57(5):347-52.  
14
- 15 22. Adams G, Gulliford MC, Ukoumunne OC, Eldridge S, Chinn S, Campbell  
16  
17 MJ. Patterns of intra-cluster correlation from primary care research to inform study  
18  
19 design and analysis. *J Clin Epidemiol*. 2004;57(8):785-94.  
20
- 21 23. Killip S, Mahfoud Z, Pearce K. What is an intracluster correlation  
22  
23 coefficient? Crucial concepts for primary care researchers. *Ann Fam Med*.  
24  
25 2004;2(3):204-8.  
26
- 27 24. Hayes RJ MH. *Cluster Randomised Trials*. Boca Baton, FL: Chapman &  
28  
29 Hall/CRC, Taylor & Francis Group; 2009.  
30
- 31 25. Sandelowsky H, Krakau I, Modin S, Stallberg B, Nager A. Case Method  
32  
33 in COPD education for primary care physicians: study protocol for a cluster  
34  
35 randomised controlled trial. *Trials*. 2017;18(1):197.  
36  
37
- 38 26. Pettersson S. [Swedish Medical Association's Primary Care Survey] In  
39  
40 Swedish. Stockholm. Swedish Medical Association. 2015. p. 16-59.  
41  
42
- 43 27. Stead M, Angus K, Holme I, Cohen D, Tait G, Team PER. Factors  
44  
45 influencing European GPs' engagement in smoking cessation: a multi-country  
46  
47 literature review. *Br J Gen Pract*. 2009;59(566):682-90.  
48  
49
- 50 28. Black WC, Gareen IF, Soneji SS, Sicks JD, Keeler EB, Aberle DR, et al.  
51  
52 Cost-effectiveness of CT screening in the National Lung Screening Trial. *N Engl J*  
53  
54 *Med*. 2014;371(19):1793-802.  
55  
56  
57  
58  
59  
60

- 1  
2  
3 29. Foster JA, Yawn BP, Maziar A, Jenkins T, Rennard SI, Casebeer L.  
4 Enhancing COPD management in primary care settings. *MedGenMed*. 2007;9(3):24.  
5  
6  
7 30. Roddy E, Antoniak M, Britton J, Molyneux A, Lewis S. Barriers and  
8  
9 motivators to gaining access to smoking cessation services amongst deprived  
10  
11 smokers--a qualitative study. *BMC Health Serv Res*. 2006;6:147.  
12  
13 31. Zakrisson AB, Theander K, Anderzen-Carlsson A. The experience of a  
14  
15 multidisciplinary programme of pulmonary rehabilitation in primary health care from  
16  
17 the next of kin's perspective: a qualitative study. *Prim Care Respir J*. 2013;22(4):459-  
18  
19 65.  
20  
21  
22 32. National Board of Health and Welfare. Nationella riktlinjer vid vård av  
23  
24 astma och KOL. 2015 [cited Jan 24 2018]. Available from:  
25  
26 <http://www.socialstyrelsen.se/Lists/Artikelkatalog/Attachments/19949/2015-11-3.pdf>  
27  
28  
29 33. Ingemansson M. Evidence-based practice for children with asthma in  
30  
31 primary care – quality of management and effects of learning Stockholm: Karolinska  
32  
33 Institutet, Stockholm, Sweden; 2016.  
34  
35 34. Adams SG, Pitts J, Wynne J, Yawn BP, Diamond EJ, Lee S, et al. Effect  
36  
37 of a primary care continuing education program on clinical practice of chronic  
38  
39 obstructive pulmonary disease: translating theory into practice. *Mayo Clin Proc*.  
40  
41 2012;87(9):862-70.  
42  
43  
44 35. Berggren E, Odlund Olin A, Orrevall Y, Strang P, Johansson SE,  
45  
46 Tornkvist L. Early palliative home care: Evaluation of an interprofessional educational  
47  
48 intervention for district nurses and general practitioners about nutritional care. *SAGE*  
49  
50 *open medicine*. 2017;5:2050312117726465.  
51  
52  
53 36. Engstrom K, Magnusson C, Galanti MR. Socio-demographic, lifestyle  
54  
55 and health characteristics among snus users and dual tobacco users in Stockholm  
56  
57 County, Sweden. *BMC Public Health*. 2010;10:619.  
58  
59

- 1  
2  
3 37. Nacul LC, Soljak M, Meade T. Model for estimating the population  
4 prevalence of chronic obstructive pulmonary disease: cross sectional data from the  
5 Health Survey for England. *Popul Health Metr.* 2007;5:8.  
6  
7  
8  
9 38. Wass V, Van der Vleuten C, Shatzer J, Jones R. Assessment of clinical  
10 competence. *Lancet.* 2001;357(9260):945-9.  
11  
12  
13 39. Baron RJ. What's keeping us so busy in primary care? A snapshot from  
14 one practice. *N Engl J Med.* 2010;362(17):1632-6.  
15  
16  
17  
18  
19  
20  
21  
22  
23  
24  
25  
26  
27  
28  
29  
30  
31  
32  
33  
34  
35  
36  
37  
38  
39  
40  
41  
42  
43  
44  
45  
46  
47  
48  
49  
50  
51  
52  
53  
54  
55  
56  
57  
58  
59  
60

**Table 1. The main characteristics of the participants in the two intervention arms and reference group.**

| Main characteristics                              | Baseline    | 12 months                |                          |
|---------------------------------------------------|-------------|--------------------------|--------------------------|
|                                                   | All         | Responders               | Non-responders           |
| Participants                                      |             |                          |                          |
| n (%)                                             | 255 (100)   | 133 (52)                 | 126 (48)                 |
| Number of participants per PHCC, mean (range)     | 7.5 (2-15)  | 4.3 (1-10)               |                          |
| <b>Gender, n (%)</b>                              |             |                          |                          |
| Women                                             | 149 (58)    | 81 (61)                  | 68 (56)                  |
| <b>Age, mean (range)</b>                          | 47 (27-69)  | 47 (27-68)               | 47 (27-69)               |
| <b>Degree in family medicine, n (%)</b>           |             |                          |                          |
| Specialist in family medicine                     | 184 (72)    | 102 (77)                 | 82 (67)                  |
| Training to be a specialist in family medicine    | 71 (28)     | 31 (23)                  | 40 (33)                  |
| <b>Years worked in primary care, mean (range)</b> | 14 (0-41)   | 15 (0-37)                | 14 (0-41)                |
| <b>Asthma/COPD clinic at PHCC, n (%)</b>          |             |                          |                          |
| Yes                                               | 114 (45)    | 70 (53)                  | 51 (42)                  |
| <b>Ownership of PHCC</b>                          |             |                          |                          |
| Stockholm County Council                          | 132 (52)    | 71 (53)                  | 61 (50)                  |
| Private                                           | 123 (48)    | 62 (47)                  | 61 (50)                  |
| <b>CNI of PHCC's location, mean (SD)</b>          | 2.17 (0.78) | 2.03 <sup>1</sup> (0.67) | 2.32 <sup>1</sup> (0.86) |
| range                                             | 0.92-5.05   | 0.92-5.05                | 0.92-5.05                |

CNI, Care Need Index; COPD, chronic obstructive pulmonary disease; PHCC, primary health care center. The CNI is based on sociodemographic factors, including percentage of older adults living alone, children under age 5, unemployed people, people with low educational status, single parents, high mobility, and foreign-born people. High CNI = high sociodemographic burden; mean CNI in Stockholm County = 2.49.

<sup>1</sup>p of the difference between responders and non-responders <0.05

**Table 2.** Comparison of the odds ratios and 95% confidence intervals of scoring 1 or 2 rather than 0 points in the two intervention arms (case methods, CM; traditional lectures, TL) and the reference group (no continuing medical education) 12 months after the intervention. All measures are adjusted for clusters (primary health care centers) and total scores at baseline.

| Question                                    | Odds Ratio                                |                    |                 |                       |    |
|---------------------------------------------|-------------------------------------------|--------------------|-----------------|-----------------------|----|
|                                             | CM and TL vs. Reference group<br>[95% CI] |                    |                 | CM vs. TL<br>[95% CI] |    |
|                                             | CM                                        | TL                 | Reference group | CM                    | TL |
| 1. Diagnostic procedures                    | 0.55 [0.22 – 1.40]                        | 0.55 [0.21 – 1.42] | 1               | 1.00 [0.43 – 2.31]    | 1  |
| 2. Spirometry interpretation                | 1.29 [0.53 – 3.10]                        | 0.61 [0.24 – 1.55] | 1               | 2.10 [0.90 – 4.95]    | 1  |
| 3. Smoking cessation (unmotivated patients) | N.A. <sup>1</sup>                         |                    |                 |                       |    |
| 4. Acute exacerbation (treatment)           | 1.40 [0.57 – 3.45]                        | 0.77 [0.31 – 1.96] | 1               | 1.81 [0.77 – 4.24]    | 1  |
| 5. Acute exacerbation (follow-up)           | N.A. <sup>2</sup>                         |                    |                 |                       |    |
| 6. Smoking cessation (motivated patients)   | 0.41 [0.14 – 1.24]                        | 1.35 [0.39 – 4.69] | 1               | 0.30 [0.10 – 0.88]    | 1  |
| 7. Maintenance treatment                    | 1.04 [0.42 – 2.54]                        | 0.72 [0.30 – 1.74] | 1               | 1.44 [0.63 – 3.29]    | 1  |
| 8. Comorbidity: heart failure               | 2.46 [0.79 – 7.66]                        | 1.70 [0.61 – 4.95] | 1               | 1.45 [0.57 – 3.67]    | 1  |
| 9. Follow-up (stable patients)              | 2.37 [0.96 – 5.86]                        | 4.48 [1.51 – 13.3] | 1               | 0.53 [0.20 – 1.40]    | 1  |
| 10. Inter-professional interventions        | 1.82 [0.59 – 5.61]                        | 1.42 [0.45 – 4.49] | 1               | 1.29 [0.50 – 3.31]    | 1  |
| 11. Suspected respiratory failure           | 1.51 [0.62 – 3.72]                        | 0.97 [0.39 – 2.41] | 1               | 1.57 [0.68 – 3.62]    | 1  |
| 12. Multi-morbidity, no airway symptoms     | 1.36 [0.54 – 3.40]                        | 0.97 [0.39 – 2.43] | 1               | 1.39 [0.60 – 3.24]    | 1  |
| 13. Multi-morbidity, airway symptoms        | 1.34 [0.53 – 3.37]                        | 2.64 [1.06 – 6.60] | 1               | 0.51 [0.22 – 1.15]    | 1  |

<sup>1</sup>Odds ratios not applicable because there was no convergence in the model.

<sup>2</sup>Odds ratios not applicable because the model was questionable.



## FIGURE LEGENDS

**Figure 1.** Study enrollment, general practitioner part of the PRIMAIR study.

**Figure 2.** Development of total scores in the two intervention arms and reference group over time. Total score minimum = 0 points, maximum = 26 points.

**Figure 3.** Baseline results per question in the two intervention arms and reference group, presented as percent of participants who scored 1 or 2 points. Each response was given a score of between 0 and 2 points; the highest possible score was 2 points. On questions 2, 4, 7, 10, and 11, only two scores were possible: 0 or 2 points.

**Figure 4a-c.** Changes over time in the scores per question in each group studied, presented as percent of participants who scored 1 or 2 points. Each response was given a score of between 0 and 2 points; the highest possible score was 2 points. On questions 2, 4, 7, 10, and 11, only two scores were possible: 0 or 2 points.

Figure 1. Study enrollment, general practitioner part of the PRIMAIR study.

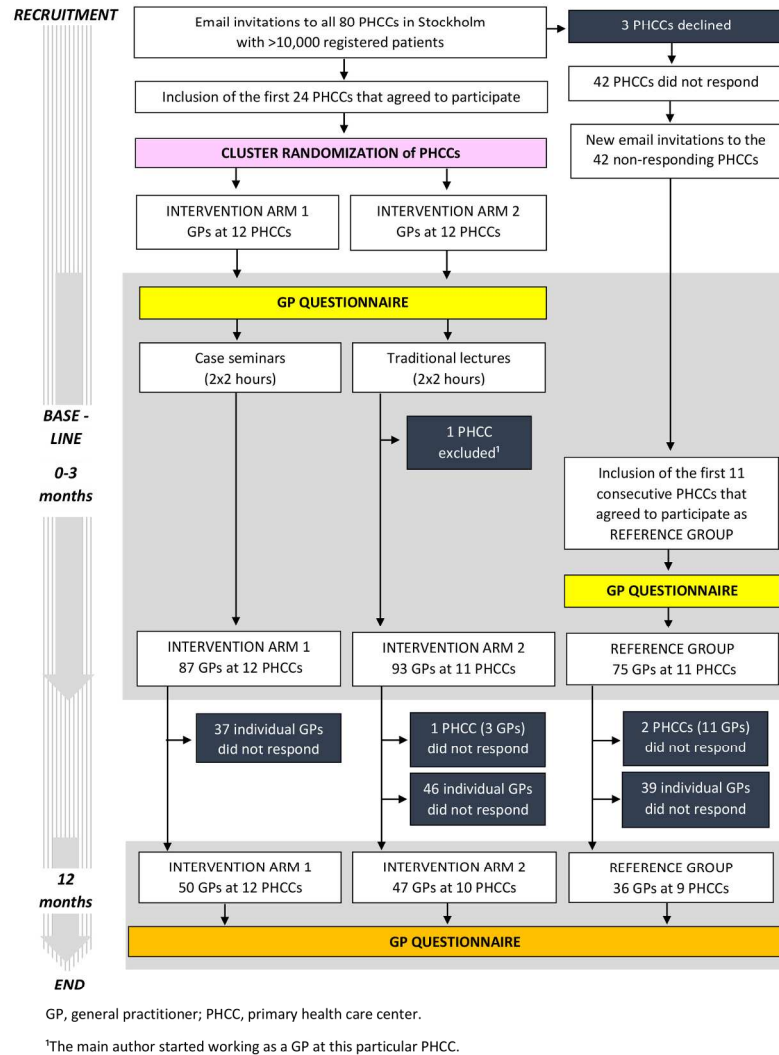

Figure 1. Study enrollment, general practitioner part of the PRIMAIR study.

165x233mm (300 x 300 DPI)

1  
2  
3  
4  
5  
6  
7  
8  
9  
10  
11  
12  
13  
14  
15  
16  
17  
18  
19  
20  
21  
22  
23  
24  
25  
26  
27  
28  
29  
30  
31  
32  
33  
34  
35  
36  
37  
38  
39  
40  
41  
42  
43  
44  
45  
46  
47  
48  
49  
50  
51  
52  
53  
54  
55  
56  
57  
58  
59  
60

**Figure 2.** Development of total scores in the two intervention arms and reference group over time. Total score minimum = 0 points, maximum = 26 points.

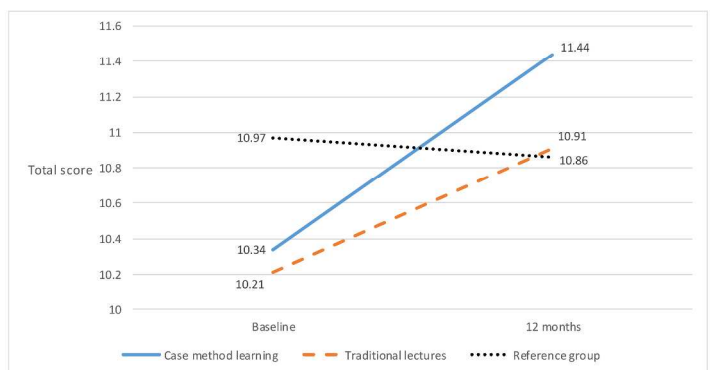

Figure 2. Development of total scores in the two intervention arms and reference group over time. Total score minimum = 0 points, maximum = 26 points.

233x330mm (600 x 600 DPI)

1  
2  
3  
4  
5  
6  
7  
8  
9  
10  
11  
12  
13  
14  
15  
16  
17  
18  
19  
20  
21  
22  
23  
24  
25  
26  
27  
28  
29  
30  
31  
32  
33  
34  
35  
36  
37  
38  
39  
40  
41  
42  
43  
44  
45  
46  
47  
48  
49  
50  
51  
52  
53  
54  
55  
56  
57  
58  
59  
60

**Figure 3.** Baseline results per question in the two intervention arms and reference group, presented as percent of participants who scored 1 or 2 points. Each response was given a score of between 0 and 2 points; the highest possible score was 2 points. On questions 2, 4, 7, 10, and 11, only two scores were possible: 0 or 2 points.



<sup>1</sup>Questions: 1) Diagnostic procedures; 2) Spirometry interpretation; 3) Smoking cessation (unmotivated patients); 4) Treatment of acute exacerbation; 5) Follow-up of acute exacerbation; 6) Smoking cessation (motivated patients); 7) Maintenance treatment of COPD (GOLD B patients); 8) Heart failure medication for patients with COPD; 9) Follow-up of patients with stable COPD; 10) Inter-professional interventions; 11) Managing a suspected respiratory failure; 12) Multi-morbidity in COPD patients without obvious symptoms from airways or COPD comorbidities (an annual check-up); 13) Multi-morbidity in COPD patients with symptoms from airways and/or COPD comorbidities (an annual check-up)

Figure 3. Baseline results per question in the two intervention arms and reference group, presented as percent of participants who scored 1 or 2 points. Each response was given a score of between 0 and 2 points; the highest possible score was 2 points. On questions 2, 4, 7, 10, and 11, only two scores were possible: 0 or 2 points.

165x233mm (300 x 300 DPI)

**Figure 4a-c.** Changes over time in the scores per question in each group studied, presented as percent of participants who scored 1 or 2 points. Each response was given a score of between 0 and 2 points; the highest possible score was 2 points. On questions 2, 4, 7, 10, and 11, only two scores were possible: 0 or 2 points.

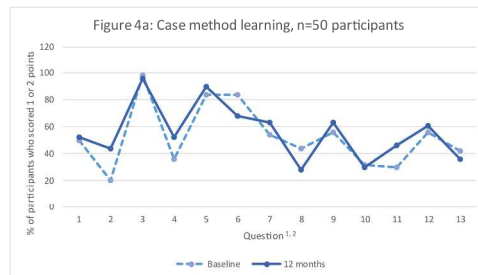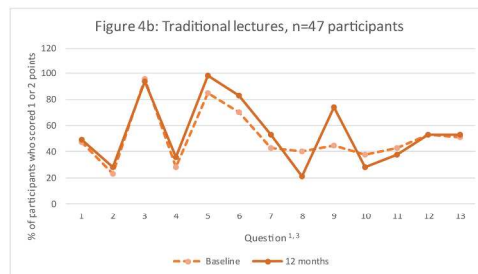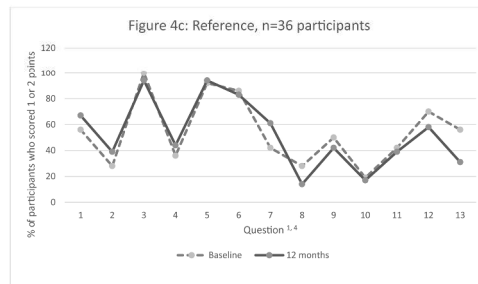

<sup>1</sup>Questions: 1) Diagnostic procedures; 2) Spirometry interpretation; 3) Smoking cessation (unmotivated patients); 4) Treatment of acute exacerbation; 5) Follow-up of acute exacerbation; 6) Smoking cessation (motivated patients); 7) Maintenance treatment of COPD (GOLD B patients); 8) Heart failure medication for patients with COPD; 9) Follow-up of patients with stable COPD; 10) Inter-professional interventions; 11) Managing a suspected respiratory failure; 12) Multi-morbidity in COPD patients without obvious symptoms from airways or COPD comorbidities (an annual check-up); 13) Multi-morbidity in COPD patients with symptoms from airways and/or COPD comorbidities (an annual check-up)

<sup>2</sup>In figure 4a,  $p < 0.05$  for question 2

<sup>3</sup>In figure 4b,  $p < 0.05$  for question 9

<sup>4</sup>In figure 4c,  $p < 0.05$  for question 13

Figure 4a-c. Changes over time in the scores per question in each group studied, presented as percent of participants who scored 1 or 2 points. Each response was given a score of between 0 and 2 points; the highest possible score was 2 points. On questions 2, 4, 7, 10, and 11, only two scores were possible: 0 or 2 points.

210x386mm (300 x 300 DPI)

**Supplementary file 1: CONSORT 2010 checklist of information to include when reporting a cluster randomised trial**

| Section/Topic                    | Item No | Standard Checklist item                                                                                                                | Extension for cluster designs                                                                 | Page No *                     |
|----------------------------------|---------|----------------------------------------------------------------------------------------------------------------------------------------|-----------------------------------------------------------------------------------------------|-------------------------------|
| <b>Title and abstract</b>        |         |                                                                                                                                        |                                                                                               |                               |
|                                  | 1a      | Identification as a randomised trial in the title                                                                                      | Identification as a cluster randomised trial in the title                                     | 1                             |
|                                  | 1b      | Structured summary of trial design, methods, results, and conclusions (for specific guidance see CONSORT for abstracts) <sup>1,2</sup> | See table 2                                                                                   | 2                             |
| <b>Introduction</b>              |         |                                                                                                                                        |                                                                                               |                               |
| <b>Background and objectives</b> | 2a      | Scientific background and explanation of rationale                                                                                     | Rationale for using a cluster design                                                          | 4, 6, Ref 24 (Study Protocol) |
|                                  | 2b      | Specific objectives or hypotheses                                                                                                      | Whether objectives pertain to the the cluster level, the individual participant level or both | 6, 7, Ref 24 (Study Protocol) |
| <b>Methods</b>                   |         |                                                                                                                                        |                                                                                               |                               |
| <b>Trial design</b>              | 3a      | Description of trial design (such as parallel, factorial) including allocation ratio                                                   | Definition of cluster and description of how the design features apply to the clusters        | 6, 9, Ref 24 (Study Protocol) |
|                                  | 3b      | Important changes to methods after trial commencement (such as eligibility criteria), with reasons                                     |                                                                                               | N.A.                          |
| <b>Participants</b>              | 4a      | Eligibility criteria for participants                                                                                                  | Eligibility criteria for clusters                                                             | 6-7, Ref 24 (Study Protocol)  |
|                                  | 4b      | Settings and locations where the data were collected                                                                                   |                                                                                               | 6, Ref 24 (Study Protocol)    |
| <b>Interventions</b>             | 5       | The interventions for each group with sufficient details to allow replication, including how and when they were actually administered  | Whether interventions pertain to the cluster level, the individual participant level or both  | 7-9, Ref 24 (Study Protocol)  |

|                                         |     |                                                                                                                                                                                             |                                                                                                                                                                                                                    |                                                     |
|-----------------------------------------|-----|---------------------------------------------------------------------------------------------------------------------------------------------------------------------------------------------|--------------------------------------------------------------------------------------------------------------------------------------------------------------------------------------------------------------------|-----------------------------------------------------|
| <b>Outcomes</b>                         | 6a  | Completely defined pre-specified primary and secondary outcome measures, including how and when they were assessed                                                                          | Whether outcome measures pertain to the cluster level, the individual participant level or both                                                                                                                    | 7, 8, Supplementary File 2, Ref 24 (Study Protocol) |
|                                         | 6b  | Any changes to trial outcomes after the trial commenced, with reasons                                                                                                                       |                                                                                                                                                                                                                    | N.A.                                                |
| <b>Sample size</b>                      | 7a  | How sample size was determined                                                                                                                                                              | Method of calculation, number of clusters(s) (and whether equal or unequal cluster sizes are assumed), cluster size, a coefficient of intracluster correlation (ICC or $k$ ), and an indication of its uncertainty | 9                                                   |
|                                         | 7b  | When applicable, explanation of any interim analyses and stopping guidelines                                                                                                                |                                                                                                                                                                                                                    | N.A.                                                |
| <b>Randomisation:</b>                   |     |                                                                                                                                                                                             |                                                                                                                                                                                                                    |                                                     |
| <b>Sequence generation</b>              | 8a  | Method used to generate the random allocation sequence                                                                                                                                      |                                                                                                                                                                                                                    | 6                                                   |
|                                         | 8b  | Type of randomisation; details of any restriction (such as blocking and block size)                                                                                                         | Details of stratification or matching if used                                                                                                                                                                      | 6                                                   |
| <b>Allocation concealment mechanism</b> | 9   | Mechanism used to implement the random allocation sequence (such as sequentially numbered containers), describing any steps taken to conceal the sequence until interventions were assigned | Specification that allocation was based on clusters rather than individuals and whether allocation concealment (if any) was at the cluster level, the individual participant level or both                         | 6 + Ref 24 (Study Protocol)                         |
| <b>Implementation</b>                   | 10  | Who generated the random allocation sequence, who enrolled participants, and who assigned participants to interventions                                                                     | Replace by 10a, 10b and 10c                                                                                                                                                                                        |                                                     |
|                                         | 10a |                                                                                                                                                                                             | Who generated the random allocation sequence, who                                                                                                                                                                  | 6, Ref 24 (Study Protocol)                          |

|                            |     |                                                                                                                                                |                                                                                                                                                                     |                             |
|----------------------------|-----|------------------------------------------------------------------------------------------------------------------------------------------------|---------------------------------------------------------------------------------------------------------------------------------------------------------------------|-----------------------------|
|                            |     |                                                                                                                                                | enrolled clusters, and who assigned clusters to interventions                                                                                                       |                             |
|                            | 10b |                                                                                                                                                | Mechanism by which individual participants were included in clusters for the purposes of the trial (such as complete enumeration, random sampling)                  | 7, Ref 24 (Study Protocol)  |
|                            | 10c |                                                                                                                                                | From whom consent was sought (representatives of the cluster, or individual cluster members, or both), and whether consent was sought before or after randomisation | 10, Ref 24 (Study Protocol) |
| <b>Blinding</b>            |     |                                                                                                                                                |                                                                                                                                                                     |                             |
|                            | 11a | If done, who was blinded after assignment to interventions (for example, participants, care providers, those assessing outcomes) and how       |                                                                                                                                                                     | N.A.                        |
|                            | 11b | If relevant, description of the similarity of interventions                                                                                    |                                                                                                                                                                     | N.A.                        |
| <b>Statistical methods</b> |     |                                                                                                                                                |                                                                                                                                                                     |                             |
|                            | 12a | Statistical methods used to compare groups for primary and secondary outcomes                                                                  | How clustering was taken into account                                                                                                                               | 9-10                        |
|                            | 12b | Methods for additional analyses, such as subgroup analyses and adjusted analyses                                                               |                                                                                                                                                                     | 9                           |
| <b>Results</b>             |     |                                                                                                                                                |                                                                                                                                                                     |                             |
|                            | 13a | For each group, the numbers of participants who were randomly assigned, received intended treatment, and were analysed for the primary outcome | For each group, the numbers of clusters that were randomly assigned, received intended treatment, and were analysed for the primary outcome                         | 10-11, Figure 1             |



|                                |     |                                                                                                                                                   |                                                                                                                                               |                                  |
|--------------------------------|-----|---------------------------------------------------------------------------------------------------------------------------------------------------|-----------------------------------------------------------------------------------------------------------------------------------------------|----------------------------------|
|                                | 13b | For each group, losses and exclusions after randomisation, together with reasons                                                                  | For each group, losses and exclusions for both clusters and individual cluster members                                                        | 10-11, Figure 1                  |
| <b>Recruitment</b>             | 14a | Dates defining the periods of recruitment and follow-up                                                                                           |                                                                                                                                               | 6, Figure 1                      |
|                                | 14b | Why the trial ended or was stopped                                                                                                                |                                                                                                                                               | N.A.                             |
| <b>Baseline data</b>           | 15  | A table showing baseline demographic and clinical characteristics for each group                                                                  | Baseline characteristics for the individual and cluster levels as applicable for each group                                                   | 10-13, 26 (Table 1), Figures 2-4 |
| <b>Numbers analysed</b>        | 16  | For each group, number of participants (denominator) included in each analysis and whether the analysis was by original assigned groups           | For each group, number of clusters included in each analysis                                                                                  | 10-13, Figure 1                  |
| <b>Outcomes and estimation</b> | 17a | For each primary and secondary outcome, results for each group, and the estimated effect size and its precision (such as 95% confidence interval) | Results at the individual or cluster level as applicable and a coefficient of intracluster correlation (ICC or $k$ ) for each primary outcome | 11-12                            |
|                                | 17b | For binary outcomes, presentation of both absolute and relative effect sizes is recommended                                                       |                                                                                                                                               | N.A.                             |
| <b>Ancillary analyses</b>      | 18  | Results of any other analyses performed, including subgroup analyses and adjusted analyses, distinguishing pre-specified from exploratory         |                                                                                                                                               | 11                               |
| <b>Harms</b>                   | 19  | All important harms or unintended effects in each group (for specific guidance see CONSORT for harms <sup>3</sup> )                               |                                                                                                                                               | N.A.                             |
| <b>Discussion</b>              |     |                                                                                                                                                   |                                                                                                                                               |                                  |
| <b>Limitations</b>             | 20  | Trial limitations, addressing sources of potential bias,                                                                                          |                                                                                                                                               | 16-18                            |

|                          |    |                                                                                                               |                                                                                 |
|--------------------------|----|---------------------------------------------------------------------------------------------------------------|---------------------------------------------------------------------------------|
|                          |    | imprecision, and, if relevant, multiplicity of analyses                                                       |                                                                                 |
| <b>Generalisability</b>  | 21 | Generalisability (external validity, applicability) of the trial findings                                     | Generalisability to clusters and/or individual participants (as relevant) 17-19 |
| <b>Interpretation</b>    | 22 | Interpretation consistent with results, balancing benefits and harms, and considering other relevant evidence | 19                                                                              |
| <b>Other information</b> |    |                                                                                                               |                                                                                 |
| <b>Registration</b>      | 23 | Registration number and name of trial registry                                                                | 3                                                                               |
| <b>Protocol</b>          | 24 | Where the full trial protocol can be accessed, if available                                                   | Reference 24                                                                    |
| <b>Funding</b>           | 25 | Sources of funding and other support (such as supply of drugs), role of funders                               | 3, 20                                                                           |

\* Note: page numbers optional depending on journal requirements

**Table 2: Extension of CONSORT for abstracts<sup>1,2</sup> to reports of cluster randomised trials**

| Item                      | Standard Checklist item                                                                                     | Extension for cluster trials                                                                                   |
|---------------------------|-------------------------------------------------------------------------------------------------------------|----------------------------------------------------------------------------------------------------------------|
| <b>Title</b>              | Identification of study as randomised                                                                       | <b>Identification of study as cluster randomised</b>                                                           |
| <b>Trial design</b>       | Description of the trial design (e.g. parallel, cluster, non-inferiority)                                   |                                                                                                                |
| <b>Methods</b>            |                                                                                                             |                                                                                                                |
| <b>Participants</b>       | Eligibility criteria for participants and the settings where the data were collected                        | <b>Eligibility criteria for clusters</b>                                                                       |
| <b>Interventions</b>      | Interventions intended for each group                                                                       |                                                                                                                |
| <b>Objective</b>          | Specific objective or hypothesis                                                                            | <b>Whether objective or hypothesis pertains to the cluster level, the individual participant level or both</b> |
| <b>Outcome</b>            | Clearly defined primary outcome for this report                                                             | <b>Whether the primary outcome pertains to the cluster level, the individual participant level or both</b>     |
| <b>Randomization</b>      | How participants were allocated to interventions                                                            | <b>How clusters were allocated to interventions</b>                                                            |
| <b>Blinding (masking)</b> | Whether or not participants, care givers, and those assessing the outcomes were blinded to group assignment |                                                                                                                |
| <b>Results</b>            |                                                                                                             |                                                                                                                |
| <b>Numbers randomized</b> | Number of participants randomized to each group                                                             | <b>Number of clusters randomized to each group</b>                                                             |
| <b>Recruitment</b>        | Trial status <sup>1</sup>                                                                                   |                                                                                                                |
| <b>Numbers analysed</b>   | Number of participants analysed in each group                                                               | <b>Number of clusters analysed in each group</b>                                                               |
| <b>Outcome</b>            | For the primary outcome, a result for each group and the estimated effect size and its precision            | <b>Results at the cluster or individual participant level as applicable for each primary outcome</b>           |
| <b>Harms</b>              | Important adverse events or side effects                                                                    |                                                                                                                |
| <b>Conclusions</b>        | General interpretation of the results                                                                       |                                                                                                                |
| <b>Trial registration</b> | Registration number and name of trial register                                                              |                                                                                                                |
| <b>Funding</b>            | Source of funding                                                                                           |                                                                                                                |

<sup>1</sup> Relevant to Conference Abstracts

## REFERENCES

---

- 1 Hopewell S, Clarke M, Moher D, Wager E, Middleton P, Altman DG, et al. CONSORT for reporting randomised trials in journal and conference abstracts. *Lancet* 2008, 371:281-283
- 2 Hopewell S, Clarke M, Moher D, Wager E, Middleton P, Altman DG at al (2008) CONSORT for reporting randomized controlled trials in journal and conference abstracts: explanation and elaboration. *PLoS Med* 5(1): e20
- 3 Ioannidis JP, Evans SJ, Gotzsche PC, O'Neill RT, Altman DG, Schulz K, Moher D. Better reporting of harms in randomized trials: an extension of the CONSORT statement. *Ann Intern Med* 2004; 141(10):781-788.

For peer review only

**Supplementary file 2.** The GP questionnaire, with the addition of the intended learning outcomes (light green arrows) and the scoring templates<sup>1</sup> (dark green arrows). The questionnaire and the scoring were based on the guidelines that were available prior to 2015<sup>1</sup>.

### Case 1

*Your patient, a 59-year old male computer technician, comes to see you complaining of severe breathlessness in the past year, especially when exerting himself. He has attributed it to being unfit, since he doesn't like exercising. He has smoked for all his adult life. He also has a phlegmy morning cough. He has no known allergies and no pets. His children are worried about him, hence his appointment with you. He says his family go on at him about his smoking, but he has no intention of quitting.*

**Question 1** After a clinical examination, you suspect him of having COPD. Which of the following options (you may choose more than one answer) form part of your initial investigation of this patient?

- a PEF measurement
- b Spirometry
- c Lung X-ray
- d PEF curve
- e NT-ProBNP
- f BMI

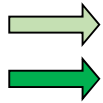

|                         |                                                                              |
|-------------------------|------------------------------------------------------------------------------|
| <b>ILOs<sup>2</sup></b> | Diagnostic procedures                                                        |
| <b>Scoring template</b> | b+c+e = 2 points<br>b+c = 1 points<br>b+c+e+a = 1 points<br>b+c+a = 1 points |

*His spirometry reading:*

| Variable | Normal value | Before bronchial dilation |             | After bronchial dilation |             | % change |
|----------|--------------|---------------------------|-------------|--------------------------|-------------|----------|
|          |              | Recorded value            | % of normal | Recorded value           | % of normal |          |
| VC       | 5.2          | 3.5                       | 67          | 3.6                      | 69          | +3       |
| FVC      | 5.2          | 3.0                       | 58          | 3.0                      | 58          | +3       |
| FEV1     | 3.9          | 1.7                       | 44          | 2.0                      | 56          | +18      |
| FEV1/VC  | 0.75         | 0.49                      | 65          | 0.55                     | 73          | +12      |
| FEV1/FVC | 0.75         | 0.57                      | 76          | 0.67                     | 89          | +18      |

**Question 2** Going by his spirometry values, the most probable diagnosis is:

- a Asthma

|    |                                                                                                                                                                                                                                                                                                                      |                                                                                                                                                                         |                                                                                                                                                                                            |
|----|----------------------------------------------------------------------------------------------------------------------------------------------------------------------------------------------------------------------------------------------------------------------------------------------------------------------|-------------------------------------------------------------------------------------------------------------------------------------------------------------------------|--------------------------------------------------------------------------------------------------------------------------------------------------------------------------------------------|
| 1  |                                                                                                                                                                                                                                                                                                                      | b                                                                                                                                                                       | COPD, stage 2                                                                                                                                                                              |
| 2  |                                                                                                                                                                                                                                                                                                                      | c                                                                                                                                                                       | Asthma and COPD, stage 2                                                                                                                                                                   |
| 3  |                                                                                                                                                                                                                                                                                                                      | d                                                                                                                                                                       | COPD, stage 1                                                                                                                                                                              |
| 4  |                                                                                                                                                                                                                                                                                                                      | e                                                                                                                                                                       | Asthma and COPD, stage 3                                                                                                                                                                   |
| 5  |                                                                                                                                                                                                                                                                                                                      | f                                                                                                                                                                       | COPD, stage 3                                                                                                                                                                              |
| 6  |                                                                                                                                                                                                                                                                                                                      | g                                                                                                                                                                       | Neither asthma nor COPD                                                                                                                                                                    |
| 7  |                                                                                                                                                                                                                                                                                                                      |                                                                                                                                                                         |                                                                                                                                                                                            |
| 8  |                                                                                                                                                                                                                                     | <b>ILOs</b>                                                                                                                                                             | Spirometry interpretation                                                                                                                                                                  |
| 9  |                                                                                                                                                                                                                                     | <b>Scoring template</b>                                                                                                                                                 | b = 2 points                                                                                                                                                                               |
| 10 |                                                                                                                                                                                                                                                                                                                      |                                                                                                                                                                         |                                                                                                                                                                                            |
| 11 |                                                                                                                                                                                                                                                                                                                      |                                                                                                                                                                         |                                                                                                                                                                                            |
| 12 | <b>Question 3</b>                                                                                                                                                                                                                                                                                                    | <b>How do you deal with his reluctance to quit smoking?</b>                                                                                                             |                                                                                                                                                                                            |
| 13 |                                                                                                                                                                                                                                                                                                                      | Write your answer here                                                                                                                                                  |                                                                                                                                                                                            |
| 14 |                                                                                                                                                                                                                                                                                                                      |                                                                                                                                                                         |                                                                                                                                                                                            |
| 15 |                                                                                                                                                                                                                                                                                                                      |                                                                                                                                                                         |                                                                                                                                                                                            |
| 16 |                                                                                                                                                                                                                                                                                                                      |                                                                                                                                                                         |                                                                                                                                                                                            |
| 17 |                                                                                                                                                                                                                                                                                                                      |                                                                                                                                                                         |                                                                                                                                                                                            |
| 18 |                                                                                                                                                                                                                                     | <b>ILOs</b>                                                                                                                                                             | Smoking cessation, unmotivated patients                                                                                                                                                    |
| 19 |                                                                                                                                                                                                                                     | <b>Scoring template</b>                                                                                                                                                 | Explain/inform about smoking and COPD = 1 point<br>Provide correct information about alternatives for supporting smoking cessation (e.g. motivational interviewing, medications) = 1 point |
| 20 |                                                                                                                                                                                                                                                                                                                      |                                                                                                                                                                         |                                                                                                                                                                                            |
| 21 |                                                                                                                                                                                                                                                                                                                      |                                                                                                                                                                         |                                                                                                                                                                                            |
| 22 |                                                                                                                                                                                                                                                                                                                      |                                                                                                                                                                         |                                                                                                                                                                                            |
| 23 |                                                                                                                                                                                                                                                                                                                      |                                                                                                                                                                         |                                                                                                                                                                                            |
| 24 |                                                                                                                                                                                                                                                                                                                      |                                                                                                                                                                         |                                                                                                                                                                                            |
| 25 |                                                                                                                                                                                                                                                                                                                      |                                                                                                                                                                         |                                                                                                                                                                                            |
| 26 |                                                                                                                                                                                                                                                                                                                      |                                                                                                                                                                         |                                                                                                                                                                                            |
| 27 | <b>Case II</b>                                                                                                                                                                                                                                                                                                       |                                                                                                                                                                         |                                                                                                                                                                                            |
| 28 | <i>You are the emergency doctor on duty today at your medical centre. A 59-year old female smoker arrives complaining of an increase in breathlessness, phlegm and expectoration over the past few days.</i>                                                                                                         |                                                                                                                                                                         |                                                                                                                                                                                            |
| 29 | <i>You see from her records that she has been registered to your colleague, who ordered a spirometric examination four years ago on account of the patient being a smoker and having a cough for which she sought medical attention. Spirometry revealed COPD with an FEV1 reading at 60% of the expected value.</i> |                                                                                                                                                                         |                                                                                                                                                                                            |
| 30 | <i>You also see that she had been prescribed an expectorant, a fast-acting beta-2 stimulant in dry powder inhaler form (with some repeat prescriptions) and antibiotics for a urinary infection.</i>                                                                                                                 |                                                                                                                                                                         |                                                                                                                                                                                            |
| 31 | <i>You can hear that she is breathless and obstructive and that she has a cold. She has a temperature of 37.1 degrees, a CRP of 26 and an oxygen saturation of 91%.</i>                                                                                                                                              |                                                                                                                                                                         |                                                                                                                                                                                            |
| 32 | <i>You send her for bronchial dilatory inhalations. She subsequently feels better and her saturation rises to 95%.</i>                                                                                                                                                                                               |                                                                                                                                                                         |                                                                                                                                                                                            |
| 33 |                                                                                                                                                                                                                                                                                                                      |                                                                                                                                                                         |                                                                                                                                                                                            |
| 34 |                                                                                                                                                                                                                                                                                                                      |                                                                                                                                                                         |                                                                                                                                                                                            |
| 35 |                                                                                                                                                                                                                                                                                                                      |                                                                                                                                                                         |                                                                                                                                                                                            |
| 36 |                                                                                                                                                                                                                                                                                                                      |                                                                                                                                                                         |                                                                                                                                                                                            |
| 37 |                                                                                                                                                                                                                                                                                                                      |                                                                                                                                                                         |                                                                                                                                                                                            |
| 38 |                                                                                                                                                                                                                                                                                                                      |                                                                                                                                                                         |                                                                                                                                                                                            |
| 39 |                                                                                                                                                                                                                                                                                                                      |                                                                                                                                                                         |                                                                                                                                                                                            |
| 40 |                                                                                                                                                                                                                                                                                                                      |                                                                                                                                                                         |                                                                                                                                                                                            |
| 41 |                                                                                                                                                                                                                                                                                                                      |                                                                                                                                                                         |                                                                                                                                                                                            |
| 42 |                                                                                                                                                                                                                                                                                                                      |                                                                                                                                                                         |                                                                                                                                                                                            |
| 43 |                                                                                                                                                                                                                                                                                                                      |                                                                                                                                                                         |                                                                                                                                                                                            |
| 44 |                                                                                                                                                                                                                                                                                                                      |                                                                                                                                                                         |                                                                                                                                                                                            |
| 45 | <b>Question 4</b>                                                                                                                                                                                                                                                                                                    | <b>With which of the following drugs do you choose to treat her current symptoms following the emergency bronchial dilation? (You may choose more than one answer.)</b> |                                                                                                                                                                                            |
| 46 |                                                                                                                                                                                                                                                                                                                      |                                                                                                                                                                         |                                                                                                                                                                                            |
| 47 |                                                                                                                                                                                                                                                                                                                      |                                                                                                                                                                         |                                                                                                                                                                                            |
| 48 |                                                                                                                                                                                                                                                                                                                      |                                                                                                                                                                         |                                                                                                                                                                                            |
| 49 |                                                                                                                                                                                                                                                                                                                      |                                                                                                                                                                         |                                                                                                                                                                                            |
| 50 |                                                                                                                                                                                                                                                                                                                      | a                                                                                                                                                                       | One dose of Betapred, 16 tablets                                                                                                                                                           |
| 51 |                                                                                                                                                                                                                                                                                                                      | b                                                                                                                                                                       | One dose Betapred, 8 tablets                                                                                                                                                               |
| 52 |                                                                                                                                                                                                                                                                                                                      | c                                                                                                                                                                       | Doxycylin (oral)                                                                                                                                                                           |
| 53 |                                                                                                                                                                                                                                                                                                                      | d                                                                                                                                                                       | Amoxicillin (oral)                                                                                                                                                                         |
| 54 |                                                                                                                                                                                                                                                                                                                      | e                                                                                                                                                                       | Phenoxymethylpenicillin (penicillin V)                                                                                                                                                     |
| 55 |                                                                                                                                                                                                                                                                                                                      | f                                                                                                                                                                       | Steroids, e.g. prednisolon 20-30 mg per day, orally for 5-10 days                                                                                                                          |
| 56 |                                                                                                                                                                                                                                                                                                                      | g                                                                                                                                                                       | Steroids, e.g. prednisolon 5-10 mg per day, orally for 5-10 days                                                                                                                           |
| 57 |                                                                                                                                                                                                                                                                                                                      | h                                                                                                                                                                       | Inhaled steroids, high dose for 14 days                                                                                                                                                    |
| 58 |                                                                                                                                                                                                                                                                                                                      |                                                                                                                                                                         |                                                                                                                                                                                            |
| 59 |                                                                                                                                                                                                                                   | <b>ILOs</b>                                                                                                                                                             | Pharmacological treatment of acute exacerbation                                                                                                                                            |
| 60 |                                                                                                                                                                                                                                   |                                                                                                                                                                         |                                                                                                                                                                                            |

|    |                                                                                     |                                                                                                   |                                                                                                                                 |
|----|-------------------------------------------------------------------------------------|---------------------------------------------------------------------------------------------------|---------------------------------------------------------------------------------------------------------------------------------|
| 1  |                                                                                     | <b>Scoring</b>                                                                                    | (c or d) + f = 2 points                                                                                                         |
| 2  |                                                                                     | <b>template</b>                                                                                   |                                                                                                                                 |
| 3  |                                                                                     |                                                                                                   |                                                                                                                                 |
| 4  |                                                                                     |                                                                                                   |                                                                                                                                 |
| 5  | <b>Question 5</b>                                                                   | Do you feel this patient needs monitoring?                                                        |                                                                                                                                 |
| 6  |                                                                                     | If yes, how?                                                                                      |                                                                                                                                 |
| 7  |                                                                                     | If no, why not?                                                                                   |                                                                                                                                 |
| 8  |                                                                                     |                                                                                                   |                                                                                                                                 |
| 9  |                                                                                     |                                                                                                   |                                                                                                                                 |
| 10 |                                                                                     | Write your answer here                                                                            |                                                                                                                                 |
| 11 |                                                                                     |                                                                                                   |                                                                                                                                 |
| 12 |                                                                                     |                                                                                                   |                                                                                                                                 |
| 13 |                                                                                     |                                                                                                   |                                                                                                                                 |
| 14 |                                                                                     |                                                                                                   |                                                                                                                                 |
| 15 |    | <b>ILOs</b>                                                                                       | Follow-up of acute exacerbation ( <i>Managing issues with time pressure</i> )                                                   |
| 16 |                                                                                     |                                                                                                   |                                                                                                                                 |
| 17 |                                                                                     |                                                                                                   |                                                                                                                                 |
| 18 |    | <b>Scoring</b>                                                                                    | Propose a clinical follow-up carried out by a GP (not by a nurse) some weeks after an emergency visit = 1 point                 |
| 19 |                                                                                     | <b>template</b>                                                                                   | Propose concrete actions at the follow-up (e.g. medication, investigations, symptom evaluations) = 1 point                      |
| 20 |                                                                                     |                                                                                                   | Propose a follow-up time obviously too far in the future or 'over-investigating' with irrelevant methods = reduction of 1 point |
| 21 |                                                                                     |                                                                                                   |                                                                                                                                 |
| 22 |                                                                                     |                                                                                                   |                                                                                                                                 |
| 23 |                                                                                     |                                                                                                   |                                                                                                                                 |
| 24 |                                                                                     |                                                                                                   |                                                                                                                                 |
| 25 |                                                                                     |                                                                                                   |                                                                                                                                 |
| 26 |                                                                                     |                                                                                                   |                                                                                                                                 |
| 27 |                                                                                     |                                                                                                   |                                                                                                                                 |
| 28 |                                                                                     |                                                                                                   |                                                                                                                                 |
| 29 | <b>Question 6</b>                                                                   | She wants to quit smoking and asks for your help. What smoking cessation method do you recommend? |                                                                                                                                 |
| 30 |                                                                                     |                                                                                                   |                                                                                                                                 |
| 31 |                                                                                     |                                                                                                   |                                                                                                                                 |
| 32 |                                                                                     |                                                                                                   |                                                                                                                                 |
| 33 |                                                                                     | Write your answer here                                                                            |                                                                                                                                 |
| 34 |                                                                                     |                                                                                                   |                                                                                                                                 |
| 35 |                                                                                     |                                                                                                   |                                                                                                                                 |
| 36 |                                                                                     |                                                                                                   |                                                                                                                                 |
| 37 |                                                                                     |                                                                                                   |                                                                                                                                 |
| 38 |  | <b>ILOs</b>                                                                                       | Smoking cessation, motivated patients ( <i>Local routines and practices in supporting smoking cessation</i> )                   |
| 39 |                                                                                     |                                                                                                   |                                                                                                                                 |
| 40 |                                                                                     |                                                                                                   |                                                                                                                                 |
| 41 |  | <b>Scoring</b>                                                                                    | Propose smoking cessation strategies that employ counseling and medications = 2 points                                          |
| 42 |                                                                                     | <b>template</b>                                                                                   | Nicotine replacement therapy only = 1 point                                                                                     |
| 43 |                                                                                     |                                                                                                   | Counseling only = 1 point                                                                                                       |
| 44 |                                                                                     |                                                                                                   | Varenicline/bupropion without counseling = 0 points                                                                             |
| 45 |                                                                                     |                                                                                                   |                                                                                                                                 |
| 46 |                                                                                     |                                                                                                   |                                                                                                                                 |
| 47 |                                                                                     |                                                                                                   |                                                                                                                                 |
| 48 |                                                                                     |                                                                                                   |                                                                                                                                 |
| 49 |                                                                                     |                                                                                                   |                                                                                                                                 |
| 50 |                                                                                     |                                                                                                   |                                                                                                                                 |
| 51 |                                                                                     |                                                                                                   |                                                                                                                                 |
| 52 |                                                                                     |                                                                                                   |                                                                                                                                 |
| 53 |                                                                                     |                                                                                                   |                                                                                                                                 |

### Case III

You meet a 60-year old male patient with previously untreated COPD. Spirometry shows FEV1 at 71% of the expected value. The man quit smoking a couple of years ago and he has no medical history of acute exacerbation periods. He now experiences increasing breathlessness while out walking, gardening and doing other effortful activities.

|                                                                                     |                                                                                                                                                                                                                                                    |                                                                                                                                                            |
|-------------------------------------------------------------------------------------|----------------------------------------------------------------------------------------------------------------------------------------------------------------------------------------------------------------------------------------------------|------------------------------------------------------------------------------------------------------------------------------------------------------------|
| Question 7                                                                          | Which of the following treatment options would you recommend for this patient if you wish to start maintenance therapy? (You may choose more than one answer.)                                                                                     |                                                                                                                                                            |
|                                                                                     | a                                                                                                                                                                                                                                                  | Only short-acting beta 2 stimulants as needed                                                                                                              |
|                                                                                     | b                                                                                                                                                                                                                                                  | Long-acting beta-2 stimulants                                                                                                                              |
|                                                                                     | c                                                                                                                                                                                                                                                  | Short-acting anticholinergics                                                                                                                              |
|                                                                                     | d                                                                                                                                                                                                                                                  | Long-acting anticholinergics                                                                                                                               |
|                                                                                     | e                                                                                                                                                                                                                                                  | A combination of long-acting beta-2 stimulants and long-acting anticholinergics                                                                            |
|                                                                                     | f                                                                                                                                                                                                                                                  | Inhaled steroids                                                                                                                                           |
|                                                                                     | g                                                                                                                                                                                                                                                  | A combination preparation of long-acting beta-2 stimulants and inhaled steroids (e.g. Symbicort Forte® or Seretide Forte®)                                 |
|                                                                                     | h                                                                                                                                                                                                                                                  | Roflumilast (Daxas®)                                                                                                                                       |
|                                                                                     | i                                                                                                                                                                                                                                                  | Acetylcysteine effervescent tablets                                                                                                                        |
|    | <b>ILOs</b>                                                                                                                                                                                                                                        | Maintenance treatment of COPD (GOLD B patients)                                                                                                            |
|    | <b>Scoring template</b>                                                                                                                                                                                                                            | b = 2 points<br>alternatively d = 2 points<br>alternatively b+d = 2 points<br>alternatively e = 2 points                                                   |
| Question 8                                                                          | The patient also has heart failure, which is common in patients with COPD. When it comes to treating heart failure with beta blockers in a “normal case”, which of the following actions are <b>wrong</b> ? (You may choose more than one answer.) |                                                                                                                                                            |
|                                                                                     | a                                                                                                                                                                                                                                                  | To opt for a beta-1 selective beta blocker, such as karvedidol (Kredex®)                                                                                   |
|                                                                                     | b                                                                                                                                                                                                                                                  | To opt for a beta blocker as per the heart failure recommendations, e.g. metoprolol                                                                        |
|                                                                                     | c                                                                                                                                                                                                                                                  | To opt for no beta blockers                                                                                                                                |
|                                                                                     | d                                                                                                                                                                                                                                                  | To opt for a beta blocker as in (b) and to increase the beta agonist (beta-2 stimulant) in inhaled form                                                    |
|  | <b>ILOs</b>                                                                                                                                                                                                                                        | Heart failure medication for patients with COPD                                                                                                            |
|  | <b>Scoring template</b>                                                                                                                                                                                                                            | c+d = 2 points<br>c = 1 point                                                                                                                              |
| Question 9                                                                          | When and how do you monitor the patient after your administration of maintenance therapy for COPD?                                                                                                                                                 |                                                                                                                                                            |
|                                                                                     | Write your answer here                                                                                                                                                                                                                             |                                                                                                                                                            |
|  | <b>ILOs</b>                                                                                                                                                                                                                                        | Follow-up of patients with stable COPD ( <i>Recognizing and prioritizing COPD patients without or with few airway symptoms</i> )                           |
|  | <b>Scoring template</b>                                                                                                                                                                                                                            | Mention a clinical follow-up with symptom evaluation = 1 point<br>Follow-up occurs 1–4 months after initiation of maintenance treatment for COPD = 1 point |



|  |  |                                                                                                              |
|--|--|--------------------------------------------------------------------------------------------------------------|
|  |  | Pulmonary X-ray and spirometry are not recommended as routine monitoring of treatment = reduction of 1 point |
|--|--|--------------------------------------------------------------------------------------------------------------|

### Case IV

Your patient is a 65-year old female ex-smoker with stage 3 COPD. She has had a difficult year with three long exacerbation periods with obstructivity and has repeatedly received treatment from a hospital emergency unit and her local medical centre. In the past few years, she has met the centre's COPD nurse every six months or so. During a follow-up appointment, you find that she feels fine but has lost weight and loses her breath a little during conversation, especially directly after having walked some way down the corridor. Her saturation value is currently 93% and she has a BMI of 21.

|                                                                                     |                                                                                                                                                                     |                                                                                                                  |
|-------------------------------------------------------------------------------------|---------------------------------------------------------------------------------------------------------------------------------------------------------------------|------------------------------------------------------------------------------------------------------------------|
| Question 10                                                                         | What do you do? (You may choose more than one answer.)                                                                                                              |                                                                                                                  |
|                                                                                     | a                                                                                                                                                                   | Refer her to the lung clinic                                                                                     |
|                                                                                     | b                                                                                                                                                                   | Refer her to the physiotherapist                                                                                 |
|                                                                                     | c                                                                                                                                                                   | Advise her to eat an extra energy-rich diet                                                                      |
|                                                                                     | d                                                                                                                                                                   | Refer her to a district nurse/dietician for a dietary consultation and prescribe a liquid nutritional supplement |
|                                                                                     | e                                                                                                                                                                   | Prescribe Physical Activity in the Prevention and Treatment of Disease (FYSS)                                    |
|                                                                                     | f                                                                                                                                                                   | Send her for an arterial blood gas test                                                                          |
|                                                                                     | g                                                                                                                                                                   | Check that she is on optimal medication                                                                          |
|   | <b>ILOs</b>                                                                                                                                                         | Interprofessional interventions ( <i>Local routines for interprofessional management of COPD</i> )               |
|  | <b>Scoring template</b>                                                                                                                                             | b+c+d+g = 2 points<br>b+d+g = 2 points                                                                           |
| Question 11                                                                         | In which of the following situations would it be most appropriate for you to suspect respiratory insufficiency and send the patient for an arterial blood gas test? |                                                                                                                  |
|                                                                                     | a                                                                                                                                                                   | The patient has started to experience exacerbations                                                              |
|                                                                                     | b                                                                                                                                                                   | The patient's FEV1 is < 40% of the expected value                                                                |
|                                                                                     | c                                                                                                                                                                   | The patient's saturation at rest is < 92%                                                                        |
|                                                                                     | d                                                                                                                                                                   | The patient's saturation drops to < 90 % on exertion                                                             |
|                                                                                     | e                                                                                                                                                                   | The patient's saturation drops to < 92% on exertion                                                              |
|                                                                                     | f                                                                                                                                                                   | The patient's saturation at rest is < 94%                                                                        |
|                                                                                     | g                                                                                                                                                                   | The patient feels the drugs are not helping                                                                      |
|  | <b>ILOs</b>                                                                                                                                                         | Managing suspected respiratory failure                                                                           |
|  | <b>Scoring template</b>                                                                                                                                             | c = 2 points                                                                                                     |

**Case V**

A 70-year old male smoker with heart failure, hypertension, COPD, mild depression and chronic back pain came to see you a year ago. He is taking Spiriva®, Enalapril, Lasix Retard®, Metoprolol, Citalopram and Alvedon®, and has now come for his annual checkup. He seems to be in good health. You open the conversation by asking how he is.

Two possible scenarios now present themselves (A and B):

A) The patient says he's fine. He mainly wants to have a PSA test, renew his prescriptions and get help with his bad back.

**Question 12** How do you deal with the patient?

Write your answer here

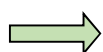

**ILOs** Multimorbidity in COPD patients without obvious symptoms from airways or COPD comorbidities (an annual check-up)  
*(Patient or GP not becoming concerned about COPD because patient's agenda does not include airway symptoms. Managing multimorbidity and discussing COPD during limited consultation time.)*

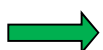

**Scoring template** Actively assess smoking status = 1 point  
Actively assess any symptoms from airways and/or COPD comorbidities = 1 point

B) The patient says he has no energy and gets easily out of breath.

**Question 13** How do you deal with the patient?

Write your answer here

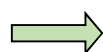

**ILOs** Multimorbidity in COPD patients with symptoms from airways and/or COPD comorbidities (an annual check-up)  
*(Connected to question 12, managing even more complicated multimorbidity during limited consultation time. Prioritizing COPD with comorbidities in the consultation.)*

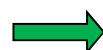

**Scoring template** All three of the following required for 2 points:  
Testing for anemia, evaluating heart function (NT-pro-BNP or echocardiography), and taking a chest X-ray.  
One of the above missing = reduction of 1 point (minimum score, 0 points).

BMI, body mass index; COPD, chronic obstructive pulmonary disease; CRP, C - reactive protein; FEV1, forced expiratory volume in 1 second; FVC, forced vital capacity; GP, general practitioner; ILOs, intended learning outcomes; PEF, peak expiratory flow; PSA, prostate specific antigen; VC, vital capacity

1           <sup>1</sup> The scoring templates were based on the pre-2015 Swedish COPD guidelines (reference 14)  
2           and the results of a qualitative study exploring the barriers to and facilitators of the COPD  
3           guideline implementation process (reference 15).  
4  
5  
6  
7  
8  
9  
10  
11  
12  
13  
14  
15  
16  
17  
18  
19  
20  
21  
22  
23  
24  
25  
26  
27  
28  
29  
30  
31  
32  
33  
34  
35  
36  
37  
38  
39  
40  
41  
42  
43  
44  
45  
46  
47  
48  
49  
50  
51  
52  
53  
54  
55  
56  
57  
58  
59  
60

For peer review only
